# Supplementary material for: Exposure to per- and polyfluoroalkyl substances (PFAS) in North Carolina homes: results from the indoor PFAS assessment (IPA) campaign
Source: Royal Society of Chemistry journal article supplement (doi:10.1039/d4em00525b), 2024-11-04
Supplement: d4em00525b1.pdf [file d4em00525b1.pdf]

1 Supplemental Information

2

3 Exposure to Per- and Polyfluoroalkyl Substances (PFAS) in North Carolina Homes: Results from the  
4 Indoor PFAS Assessment (IPA) Campaign

5

6 Naomi Y. Chang,<sup>a</sup> Clara M.A. Eichler,<sup>a</sup> Elaine A. Cohen Hubal,<sup>b</sup> Jason D. Surratt,<sup>a,c</sup> Glenn C. Morrison,<sup>a</sup>  
7 Barbara J. Turpin<sup>a\*</sup>

8

9 <sup>a</sup>Department of Environmental Sciences and Engineering, Gillings School of Global Public Health,  
10 University of North Carolina at Chapel Hill, Chapel Hill, NC, USA.

11 <sup>b</sup>Center for Public Health and Environmental Assessment, Office of Research and Development, U.S.  
12 Environmental Protection Agency, Research Triangle Park, NC, USA

13 <sup>c</sup>Department of Chemistry, College of Arts and Sciences, University of North Carolina at Chapel Hill,  
14 Chapel Hill, NC, USA

15

16 \*Corresponding author: *bjturpin@email.unc.edu*

17

18

19 No. of Pages: 30

20 No. of Figures: 4

21 No. of Tables: 17

22

## Table of Contents

|    |                                                                                        |    |
|----|----------------------------------------------------------------------------------------|----|
| 23 | Section S1: Targeted Ionic and Neutral Per- and Polyfluoroalkyl Substances (PFAS)..... | 3  |
| 24 | Section S2: Sample and Blank Collection Details .....                                  | 6  |
| 25 | Tap Water .....                                                                        | 6  |
| 26 | Sample Wipe Collection.....                                                            | 6  |
| 27 | Surface Wipe Field Blank Collection .....                                              | 6  |
| 28 | Mounted Glass Slabs (GS).....                                                          | 7  |
| 29 | Dust Collection and Sample Processing.....                                             | 8  |
| 30 | Section S3: Quality Assurance and Quality Control .....                                | 9  |
| 31 | Section S4: Exposure Assessment Parameters .....                                       | 14 |
| 32 | Section S5. Results.....                                                               | 15 |
| 33 | Section S6: Exposure Assessment Estimates .....                                        | 20 |
| 34 | References .....                                                                       | 25 |
| 35 |                                                                                        |    |
| 36 |                                                                                        |    |

37 Section S1: Targeted Ionic and Neutral Per- and  
 38 Polyfluoroalkyl Substances (PFAS)

39 **Table S1.** Targeted ionic and neutral PFAS including the CAS#, formula, and paired mass-labelled  
 40 standard used for quantification. Ionic PFAS were analyzed via ultra-high performance liquid  
 41 chromatography-electrospray ionization coupled to tandem mass spectrometry (UHPLC-ESI-MS/MS)  
 42 operated in the negative mode with multiple reaction monitoring (MRM). Neutral PFAS were analyzed  
 43 via gas chromatography mass spectrometry in electron ionization mode. Additional details regarding  
 44 analyses via UHPLC-ESI-MS/MS<sup>1,2</sup> and GC-EI-MS<sup>3</sup> are provided elsewhere.  
 45

| PFAS<br>Acronym                                 | PFAS                                             | CAS#        | Formula                                                                        | Mass-Labelled PFAS<br>Standard                                                                                             |
|-------------------------------------------------|--------------------------------------------------|-------------|--------------------------------------------------------------------------------|----------------------------------------------------------------------------------------------------------------------------|
| <b>Ionic PFAS – Analyzed by UHPLC-ESI-MS/MS</b> |                                                  |             |                                                                                |                                                                                                                            |
| PFBA                                            | Perfluoro-n-butanoic acid                        | 375-22-4    | C <sub>4</sub> HF <sub>7</sub> O <sub>2</sub>                                  | <sup>13</sup> C <sub>4</sub> -PFBA                                                                                         |
| PFPeA                                           | Perfluoro-n-pentanoic acid                       | 2706-90-3   | C <sub>5</sub> HF <sub>9</sub> O <sub>2</sub>                                  | <sup>13</sup> C <sub>5</sub> -PFPeA                                                                                        |
| PFBS                                            | Perfluorobutane sulfonic acid                    | 375-73-5    | C <sub>4</sub> HF <sub>9</sub> O <sub>3</sub> S                                | <sup>13</sup> C <sub>3</sub> -PFBS                                                                                         |
| PFHxA                                           | Perfluoro-n-hexanoic acid                        | 307-24-4    | C <sub>6</sub> HF <sub>11</sub> O <sub>2</sub>                                 | <sup>13</sup> C <sub>5</sub> -PFHxA                                                                                        |
| GenX                                            | Hexafluoropropylene oxide-dimer acid (HFPO-DA)   | 13252-13-6  | C <sub>6</sub> HF <sub>11</sub> O <sub>3</sub>                                 | <sup>13</sup> C <sub>3</sub> -PFPrOPrA                                                                                     |
| PFPeS                                           | Perfluoropentane sulfonic acid                   | 2706-91-4   | C <sub>5</sub> HF <sub>11</sub> O <sub>3</sub> S                               | <sup>13</sup> C <sub>3</sub> -PFBS                                                                                         |
| PFHpA                                           | Perfluoro-n-heptanoic acid                       | 375-85-9    | C <sub>7</sub> HF <sub>13</sub> O <sub>2</sub>                                 | <sup>13</sup> C <sub>4</sub> -PFHpA                                                                                        |
| PFHxS                                           | Perfluorohexane sulfonic acid                    | 355-46-4    | C <sub>6</sub> HF <sub>13</sub> O <sub>3</sub> S                               | <sup>13</sup> C <sub>3</sub> -PFHxS                                                                                        |
| PFOA                                            | Perfluoro-n-octanoic acid                        | 335-67-1    | C <sub>8</sub> HF <sub>15</sub> O <sub>2</sub>                                 | <sup>13</sup> C <sub>8</sub> -PFOA                                                                                         |
| PFHpS                                           | Perfluoroheptane sulfonic acid                   | 375-92-8    | C <sub>7</sub> HF <sub>15</sub> O <sub>3</sub> S                               | <sup>13</sup> C <sub>3</sub> -PFHxS                                                                                        |
| PFNA                                            | Perfluoro-n-nonanoic acid                        | 375-95-1    | C <sub>9</sub> HF <sub>17</sub> O <sub>2</sub>                                 | <sup>13</sup> C <sub>9</sub> -PFNA                                                                                         |
| PFOS                                            | Perfluorooctane sulfonic acid                    | 1763-23-1   | C <sub>8</sub> HF <sub>17</sub> O <sub>3</sub> S                               | <sup>13</sup> C <sub>8</sub> -PFOS                                                                                         |
| PFDA                                            | Perfluoro-n-decanoic acid                        | 335-76-2    | C <sub>10</sub> HF <sub>19</sub> O <sub>2</sub>                                | <sup>13</sup> C <sub>6</sub> -PFDA                                                                                         |
| PFNS                                            | Perfluorononane sulfonic acid                    | 68259-12-1  | C <sub>9</sub> HF <sub>19</sub> O <sub>3</sub> S                               | <sup>13</sup> C <sub>8</sub> -PFOS                                                                                         |
| PFUnA                                           | Perfluoro-n-undecanoic acid                      | 2058-94-8   | C <sub>11</sub> HF <sub>21</sub> O <sub>2</sub>                                | <sup>13</sup> C <sub>7</sub> -PFUdA                                                                                        |
| PFDS                                            | Perfluorodecane sulfonic acid                    | 335-77-3    | C <sub>10</sub> HF <sub>21</sub> O <sub>3</sub> S                              | <sup>13</sup> C <sub>8</sub> -PFOS                                                                                         |
| PFDoA                                           | Perfluoro-n-dodecanoic acid                      | 307-55-1    | C <sub>12</sub> HF <sub>23</sub> O <sub>2</sub>                                | <sup>13</sup> C <sub>2</sub> -PFDoA                                                                                        |
| PFTrA                                           | Perfluoro-n-tridecanoic acid                     | 72629-94-8  | C <sub>13</sub> HF <sub>25</sub> O <sub>2</sub>                                | <sup>13</sup> C <sub>2</sub> -PFDoA                                                                                        |
| PFDoS                                           | Perfluorododecane sulfonic acid                  | 79780-39-5  | C <sub>12</sub> HF <sub>25</sub> O <sub>3</sub> S                              | <sup>13</sup> C <sub>8</sub> -PFOS                                                                                         |
| PFTA                                            | Perfluoro-n-tetradecanoic acid                   | 376-06-7    | C <sub>14</sub> HF <sub>27</sub> O <sub>2</sub>                                | <sup>13</sup> C <sub>2</sub> -PFTeDA                                                                                       |
| PFHxDA                                          | Perfluoro-n-hexadecanoic acid                    | 67905-19-5  | C <sub>16</sub> HF <sub>31</sub> O <sub>2</sub>                                | <sup>13</sup> C <sub>2</sub> -PFTeDA                                                                                       |
| PFODA                                           | Perfluoro-n-octadecanoic acid                    | 16517-11-6  | C <sub>18</sub> HF <sub>35</sub> O <sub>2</sub>                                | <sup>13</sup> C <sub>2</sub> -PFTeDA                                                                                       |
| 6:2 diPAP                                       | Sodium bis(1H,1H,2H,2H-perfluorooctyl) phosphate | 57677-95-9  | C <sub>16</sub> H <sub>8</sub> F <sub>26</sub> O <sub>4</sub> PNa              | <sup>13</sup> C <sub>4</sub> - <sup>12</sup> C <sub>12</sub> H <sub>8</sub> F <sub>26</sub> O <sub>4</sub> PNa             |
| 8:2 diPAP                                       | Sodium bis(1H,1H,2H,2H-perfluorodecyl) phosphate | 114519-85-6 | C <sub>20</sub> H <sub>8</sub> F <sub>34</sub> O <sub>4</sub> PNa              | <sup>13</sup> C <sub>4</sub> - <sup>12</sup> C <sub>16</sub> H <sub>8</sub> F <sub>34</sub> O <sub>4</sub> PNa             |
| 6:2 monoPAP                                     | Sodium 1H,1H,2H,2H-perfluorooctyl phosphate      | 57678-01-0  | C <sub>8</sub> H <sub>4</sub> F <sub>13</sub> O <sub>4</sub> PNa <sub>2</sub>  | <sup>13</sup> C <sub>2</sub> - <sup>12</sup> C <sub>6</sub> H <sub>4</sub> F <sub>17</sub> O <sub>4</sub> PNa <sub>2</sub> |
| 8:2 monoPAP                                     | Sodium 1H,1H,2H,2H-perfluorodecyl phosphate      | 57678-03-2  | C <sub>10</sub> H <sub>4</sub> F <sub>17</sub> O <sub>4</sub> PNa <sub>2</sub> | <sup>13</sup> C <sub>2</sub> - <sup>12</sup> C <sub>8</sub> H <sub>4</sub> F <sub>17</sub> O <sub>4</sub> PNa <sub>2</sub> |
| <b>Neutral PFAS – Analyzed by GC-EI-MS</b>      |                                                  |             |                                                                                |                                                                                                                            |
| 6:2 FTOH                                        | 2-(Perfluorohexyl)ethanol                        | 647-42-7    | C <sub>8</sub> H <sub>5</sub> F <sub>13</sub> O                                | <sup>13</sup> C-6:2 FTOH                                                                                                   |
| 8:2 FTOH                                        | 2-(Perfluorooctyl)ethanol                        | 678-39-7    | C <sub>10</sub> H <sub>5</sub> F <sub>17</sub> O                               | <sup>13</sup> C-8:2 FTOH                                                                                                   |

|           |                                                        |            |                           |                     |
|-----------|--------------------------------------------------------|------------|---------------------------|---------------------|
| 10:2 FTOH | 2-(Perfluorodecyl)ethanol                              | 865-86-1   | $C_{12}H_5F_{21}O$        | $^{13}C$ -10:2 FTOH |
| 8:2 FTAC  | 2-(Perfluorooctyl)ethyl acrylate                       | 27905-45-9 | $C_{13}H_7F_{17}O_2$      | $^{13}C$ -8:2 FTOH  |
| 10:2 FTAC | 2-(Perfluorodecyl)ethyl acrylate                       | 17741-60-5 | $C_{15}H_7F_{21}O_2$      | $^{13}C$ -10:2 FTOH |
| MeFOSA    | N-Methylperfluorooctane sulfonamide                    | 31506-32-8 | $C_9H_4F_{17}NO_2S$       | d-MeFOSA, d-EtFOSA  |
| EtFOSA    | N-Ethylperfluorooctane sulfonamide                     | 4151-50-2  | $C_{10}H_6F_{17}NO_2S$    | d-EtFOSA            |
| MeFOSE    | N-Methyl-N-(2-hydroxyethyl)perfluorooctane sulfonamide | 24448-09-7 | $C_{11}H_8F_{17}NO_3S$    | $d^7$ -MeFOSE       |
| EtFOSE    | N-Ethyl-N-(2-hydroxyethyl)perfluorooctane sulfonamide  | 1691-99-2  | $C_{12}H_{10}O_3NSF_{17}$ | $d^7$ -MeFOSE       |

---

## 47 Section S2: Sample and Blank Collection Details

### 48 Tap Water

49 Tap water samples and blanks were allowed to come to room temperature and then spiked with 1 ng of  
50 mass-labeled PFAS standards. Sample volumes were measured in a graduated cylinder, and then 10 mL  
51 of methanol was used to rinse the sample bottles before pouring the sample back into the sample bottle.  
52 The graduated cylinder was cleaned with methanol and MilliQ water three times each between each  
53 sample blank measurement. WAX SPE cartridges were conditioned with 5 mL of methanol and 10 mL of  
54 MilliQ water before loading the samples, a slight modification of EPA Method “Improved Method for  
55 Extraction and Analysis of Perfluorinated Compounds (PFCs) from Surface Waters and Well Water by  
56 Ultra-High Performance Liquid Chromatography (UPLC)-Tandem Mass Spectrometry (MS/MS) – (SOP ID:  
57 D-EMMD-PHCB-043-SOP-03).<sup>4</sup> All methanol and water were discarded to waste. The SPE cartridges were  
58 dried before passing 5 mL of 25 mM sodium acetate buffer solution through them that was also discarded  
59 to waste, as described in the EPA Method (D-EMMD-PHCB-043-SOP-03). The sodium acetate buffer  
60 solution was created by mixing 800 mL of 25 mM acetic acid, 1.4 mL of glacial acetic (99.7% purity,  
61 ThermoFisher, Waltham, MA) acid into 1 L of MilliQ water, with 200 mL of sodium acetate solution (3.4 g  
62 sodium acetate (ThermoFisher, Waltham, MA) into 1 L of MilliQ water). Methanol was passed through the  
63 cartridge and discarded to waste before 15 mL polypropylene centrifuge tubes were placed in the  
64 collection reservoir of the vacuum manifold. Targeted PFAS were eluted with 4 mL of a 0.1% basic  
65 methanol solution made by adding 28% ammonium hydroxide (Alfa Aesar, Ward Hill, MA) to methanol. A  
66 new solution of basic methanol was made the day of each sample run. Extracts were then evaporated  
67 under the gentle flow of nitrogen to ~25  $\mu$ L. Around 75  $\mu$ L of MilliQ water was added to the extract to  
68 match the initial mobile phase conditions and then samples were analyzed via LC-MS.  
69

### 70 Sample Wipe Collection

71 At the first visit, each glass slab was cleaned by wiping three times with two methanol wetted Kimwipe in  
72 an established pattern (Figure S1). After each surface was wiped, both Kimwipes were placed in 50 mL  
73 polypropylene (PP) centrifuge tubes and stored at 4°C in a cooler for transport back to the laboratory. At  
74 lab, samples were stored at -20°C until extraction.

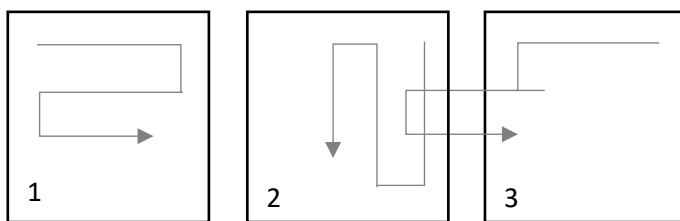

83 **Figure S1.** Wipe pattern for mounted glass slabs followed a systematic pattern. Each surface was wiped  
84 three times with methanol wetted Kimwipes (x2) from left to right, up and down, and then right to left.  
85

## 86 Surface Wipe Field Blank Collection

87 At each visit where surface wipes were collected, two field blanks each were collected by waving methanol  
88 wetted Kimwipes in the air for 2 min.<sup>5</sup> Blanks were then placed in 50 mL PP centrifuge tubes and handled  
89 and stored the same as the other surface wipe samples.  
90

## 91 Mounted Glass Slabs (GS)

92 In the lab, four Command strips (20 lb XL, 3M Company, Saint Paul, MN, USA) were adhered to the back  
93 of each GS before they were cleaned in the lab with MilliQ water, methanol, and hexane three times each  
94 the day prior to deployment in the field. GS were wrapped in pre-baked aluminum foil and stored in a PP  
95 bag for storage and transported to the field this way.  
96  
97 On the first visit to each home, except Home 78, clear tempered glass slabs (30.5 cm x 30.5 cm x 0.3 cm;  
98 Rice's Glass, Carrboro, NC, USA) were mounted using Command Strips onto the walls in the main living  
99 area in participants' homes. No slabs were mounted in Home 78 due to their walls being newly painted.  
100 To the extent possible, glass slabs were mounted away from direct sunlight to serve as a comparison to  
101 the windows.

## 102 Dust Collection and Sample Processing

103 **Table S2.** Home characteristics such as the year built, number of occupants, and flooring type in the main living area were recorded in the home  
 104 survey conducted at the first visit. For each sampling interval, the dust loading ( $\text{g m}^{-2}$ ) was calculated by dividing the mass of dust vacuumed by  
 105 the area vacuumed. Air change rates (ACHs) were estimated using a  $\text{CO}_2$  logger. More details regarding ACH estimates are provided in Eichler et  
 106 al. (2023).<sup>3</sup> See also Eichler et al., (submitted).<sup>6</sup>  
 107

| Home ID        | Year Built | No. Occupants | Main Living Area Flooring Type | Sampling Interval | Mass of Dust Vacuumed (< 500 $\mu\text{m}$ ; g) | Area Vacuumed ( $\text{m}^2$ ) | Dust Loading ( $\text{g m}^{-2}$ ) | ACH, estimate; mean $\pm$ std. dev. ( $\text{h}^{-1}$ ) |                |      |   |                  |       |      |      |       |                 |             |      |       |                |       |      |                |       |                 |       |       |                 |             |      |       |                |       |      |                |       |                 |       |       |                 |             |      |       |                |       |      |                |       |                 |       |       |                 |             |      |       |                |       |      |                |       |                 |       |       |                 |             |      |      |                |       |      |      |       |                 |       |      |       |             |      |     |                |       |      |      |       |                 |       |      |       |                |      |   |                |       |      |      |       |                 |             |      |       |                |      |      |                |       |                |      |       |                 |             |      |       |                |      |      |                |       |                |      |       |                 |             |      |      |                |   |      |      |      |                |  |  |  |             |      |     |
|----------------|------------|---------------|--------------------------------|-------------------|-------------------------------------------------|--------------------------------|------------------------------------|---------------------------------------------------------|----------------|------|---|------------------|-------|------|------|-------|-----------------|-------------|------|-------|----------------|-------|------|----------------|-------|-----------------|-------|-------|-----------------|-------------|------|-------|----------------|-------|------|----------------|-------|-----------------|-------|-------|-----------------|-------------|------|-------|----------------|-------|------|----------------|-------|-----------------|-------|-------|-----------------|-------------|------|-------|----------------|-------|------|----------------|-------|-----------------|-------|-------|-----------------|-------------|------|------|----------------|-------|------|------|-------|-----------------|-------|------|-------|-------------|------|-----|----------------|-------|------|------|-------|-----------------|-------|------|-------|----------------|------|---|----------------|-------|------|------|-------|-----------------|-------------|------|-------|----------------|------|------|----------------|-------|----------------|------|-------|-----------------|-------------|------|-------|----------------|------|------|----------------|-------|----------------|------|-------|-----------------|-------------|------|------|----------------|---|------|------|------|----------------|--|--|--|-------------|------|-----|
| 65             | 1987       | 3             | Hardwood, rugs                 | t = 0             | 0.42                                            | 21.9                           | 0.019                              | 0.25 $\pm$ 0.05                                         |                |      |   |                  |       |      |      |       |                 |             |      |       |                |       |      |                |       |                 |       |       |                 |             |      |       |                |       |      |                |       |                 |       |       |                 |             |      |       |                |       |      |                |       |                 |       |       |                 |             |      |       |                |       |      |                |       |                 |       |       |                 |             |      |      |                |       |      |      |       |                 |       |      |       |             |      |     |                |       |      |      |       |                 |       |      |       |                |      |   |                |       |      |      |       |                 |             |      |       |                |      |      |                |       |                |      |       |                 |             |      |       |                |      |      |                |       |                |      |       |                 |             |      |      |                |   |      |      |      |                |  |  |  |             |      |     |
|                |            |               |                                | t = 6             | 0.36                                            |                                | 0.016                              |                                                         | 18             | 1993 | 2 | Carpet, linoleum | t = 0 | 0.34 | 32.4 | 0.01  | 0.47 $\pm$ 0.31 | t = 6       | 0.55 | 0.017 | 78             | 1945  | 2    | Vinyl, rugs    | t = 0 | 1.39            | 12.9  | 0.11  | 0.40 $\pm$ 0.25 | t = 6       | 1.04 | 0.081 | 30             | 1962  | 2    | Hardwood, rugs | t = 0 | 1.79            | 21.8  | 0.082 | 0.44 $\pm$ 0.05 | t = 6       | 4.92 | 0.225 | 82             | 2017  | 1    | Laminate, rugs | t = 0 | 0.43            | 32.8  | 0.013 | 0.77            | 50          | 1954 | 2     | Hardwood, rugs | t = 0 | 2.08 | 25.3           | 0.082 | 0.38 $\pm$ 0.04 | t = 6 | 1.95  | 0.077           | 43          | 1920 | 2    | Laminate, rugs | t = 0 | 1.35 | 13.5 | 0.1   | 0.19 $\pm$ 0.06 | t = 6 | 1.38 | 0.102 | 35          | 1920 | 2   | Laminate, rugs | t = 0 | 2.38 | 27.0 | 0.088 | 0.58 $\pm$ 0.25 | t = 6 | 2.76 | 0.102 | 10             | 1985 | 2 | Bamboo, rugs   | t = 0 | 1.3  | 27.5 | 0.047 | 0.50 $\pm$ 0.15 | t = 6       | 1.13 | 0.041 | 59             | 2002 | 4    | Hardwood, rugs | t = 0 | 1.72           | 40.9 | 0.042 | 0.24 $\pm$ 0.04 | t = 6       | 1.28 | 0.031 | 01             | 1999 | 1    | Hardwood, rugs | t = 0 | 2.03           | 32.9 | 0.062 | 0.21 $\pm$ 0.02 | t = 6       | 1.64 | 0.05 | <b>Overall</b> |   |      |      |      |                |  |  |  | <b>Mean</b> | 1971 | 2.1 |
| 18             | 1993       | 2             | Carpet, linoleum               | t = 0             | 0.34                                            | 32.4                           | 0.01                               | 0.47 $\pm$ 0.31                                         |                |      |   |                  |       |      |      |       |                 |             |      |       |                |       |      |                |       |                 |       |       |                 |             |      |       |                |       |      |                |       |                 |       |       |                 |             |      |       |                |       |      |                |       |                 |       |       |                 |             |      |       |                |       |      |                |       |                 |       |       |                 |             |      |      |                |       |      |      |       |                 |       |      |       |             |      |     |                |       |      |      |       |                 |       |      |       |                |      |   |                |       |      |      |       |                 |             |      |       |                |      |      |                |       |                |      |       |                 |             |      |       |                |      |      |                |       |                |      |       |                 |             |      |      |                |   |      |      |      |                |  |  |  |             |      |     |
|                |            |               |                                | t = 6             | 0.55                                            |                                | 0.017                              |                                                         | 78             | 1945 | 2 | Vinyl, rugs      | t = 0 | 1.39 | 12.9 | 0.11  | 0.40 $\pm$ 0.25 | t = 6       | 1.04 | 0.081 | 30             | 1962  | 2    | Hardwood, rugs | t = 0 | 1.79            | 21.8  | 0.082 | 0.44 $\pm$ 0.05 | t = 6       | 4.92 | 0.225 | 82             | 2017  | 1    | Laminate, rugs | t = 0 | 0.43            | 32.8  | 0.013 | 0.77            | 50          | 1954 | 2     | Hardwood, rugs | t = 0 | 2.08 | 25.3           | 0.082 | 0.38 $\pm$ 0.04 | t = 6 | 1.95  | 0.077           | 43          | 1920 | 2     | Laminate, rugs | t = 0 | 1.35 | 13.5           | 0.1   | 0.19 $\pm$ 0.06 | t = 6 | 1.38  | 0.102           | 35          | 1920 | 2    | Laminate, rugs | t = 0 | 2.38 | 27.0 | 0.088 | 0.58 $\pm$ 0.25 | t = 6 | 2.76 | 0.102 | 10          | 1985 | 2   | Bamboo, rugs   | t = 0 | 1.3  | 27.5 | 0.047 | 0.50 $\pm$ 0.15 | t = 6 | 1.13 | 0.041 | 59             | 2002 | 4 | Hardwood, rugs | t = 0 | 1.72 | 40.9 | 0.042 | 0.24 $\pm$ 0.04 | t = 6       | 1.28 | 0.031 | 01             | 1999 | 1    | Hardwood, rugs | t = 0 | 2.03           | 32.9 | 0.062 | 0.21 $\pm$ 0.02 | t = 6       | 1.64 | 0.05  | <b>Overall</b> |      |      |                |       |                |      |       |                 | <b>Mean</b> | 1971 | 2.1  | -              | - | 1.48 | 26.3 | 0.06 | 0.4 $\pm$ 0.12 |  |  |  |             |      |     |
| 78             | 1945       | 2             | Vinyl, rugs                    | t = 0             | 1.39                                            | 12.9                           | 0.11                               | 0.40 $\pm$ 0.25                                         |                |      |   |                  |       |      |      |       |                 |             |      |       |                |       |      |                |       |                 |       |       |                 |             |      |       |                |       |      |                |       |                 |       |       |                 |             |      |       |                |       |      |                |       |                 |       |       |                 |             |      |       |                |       |      |                |       |                 |       |       |                 |             |      |      |                |       |      |      |       |                 |       |      |       |             |      |     |                |       |      |      |       |                 |       |      |       |                |      |   |                |       |      |      |       |                 |             |      |       |                |      |      |                |       |                |      |       |                 |             |      |       |                |      |      |                |       |                |      |       |                 |             |      |      |                |   |      |      |      |                |  |  |  |             |      |     |
|                |            |               |                                | t = 6             | 1.04                                            |                                | 0.081                              |                                                         | 30             | 1962 | 2 | Hardwood, rugs   | t = 0 | 1.79 | 21.8 | 0.082 | 0.44 $\pm$ 0.05 | t = 6       | 4.92 | 0.225 | 82             | 2017  | 1    | Laminate, rugs | t = 0 | 0.43            | 32.8  | 0.013 | 0.77            | 50          | 1954 | 2     | Hardwood, rugs | t = 0 | 2.08 | 25.3           | 0.082 | 0.38 $\pm$ 0.04 | t = 6 | 1.95  | 0.077           | 43          | 1920 | 2     | Laminate, rugs | t = 0 | 1.35 | 13.5           | 0.1   | 0.19 $\pm$ 0.06 | t = 6 | 1.38  | 0.102           | 35          | 1920 | 2     | Laminate, rugs | t = 0 | 2.38 | 27.0           | 0.088 | 0.58 $\pm$ 0.25 | t = 6 | 2.76  | 0.102           | 10          | 1985 | 2    | Bamboo, rugs   | t = 0 | 1.3  | 27.5 | 0.047 | 0.50 $\pm$ 0.15 | t = 6 | 1.13 | 0.041 | 59          | 2002 | 4   | Hardwood, rugs | t = 0 | 1.72 | 40.9 | 0.042 | 0.24 $\pm$ 0.04 | t = 6 | 1.28 | 0.031 | 01             | 1999 | 1 | Hardwood, rugs | t = 0 | 2.03 | 32.9 | 0.062 | 0.21 $\pm$ 0.02 | t = 6       | 1.64 | 0.05  | <b>Overall</b> |      |      |                |       |                |      |       |                 | <b>Mean</b> | 1971 | 2.1   | -              | -    | 1.48 | 26.3           | 0.06  | 0.4 $\pm$ 0.12 |      |       |                 |             |      |      |                |   |      |      |      |                |  |  |  |             |      |     |
| 30             | 1962       | 2             | Hardwood, rugs                 | t = 0             | 1.79                                            | 21.8                           | 0.082                              | 0.44 $\pm$ 0.05                                         |                |      |   |                  |       |      |      |       |                 |             |      |       |                |       |      |                |       |                 |       |       |                 |             |      |       |                |       |      |                |       |                 |       |       |                 |             |      |       |                |       |      |                |       |                 |       |       |                 |             |      |       |                |       |      |                |       |                 |       |       |                 |             |      |      |                |       |      |      |       |                 |       |      |       |             |      |     |                |       |      |      |       |                 |       |      |       |                |      |   |                |       |      |      |       |                 |             |      |       |                |      |      |                |       |                |      |       |                 |             |      |       |                |      |      |                |       |                |      |       |                 |             |      |      |                |   |      |      |      |                |  |  |  |             |      |     |
|                |            |               |                                | t = 6             | 4.92                                            |                                | 0.225                              |                                                         | 82             | 2017 | 1 | Laminate, rugs   | t = 0 | 0.43 | 32.8 | 0.013 | 0.77            | 50          | 1954 | 2     | Hardwood, rugs | t = 0 | 2.08 | 25.3           | 0.082 | 0.38 $\pm$ 0.04 | t = 6 | 1.95  | 0.077           | 43          | 1920 | 2     | Laminate, rugs | t = 0 | 1.35 | 13.5           | 0.1   | 0.19 $\pm$ 0.06 | t = 6 | 1.38  | 0.102           | 35          | 1920 | 2     | Laminate, rugs | t = 0 | 2.38 | 27.0           | 0.088 | 0.58 $\pm$ 0.25 | t = 6 | 2.76  | 0.102           | 10          | 1985 | 2     | Bamboo, rugs   | t = 0 | 1.3  | 27.5           | 0.047 | 0.50 $\pm$ 0.15 | t = 6 | 1.13  | 0.041           | 59          | 2002 | 4    | Hardwood, rugs | t = 0 | 1.72 | 40.9 | 0.042 | 0.24 $\pm$ 0.04 | t = 6 | 1.28 | 0.031 | 01          | 1999 | 1   | Hardwood, rugs | t = 0 | 2.03 | 32.9 | 0.062 | 0.21 $\pm$ 0.02 | t = 6 | 1.64 | 0.05  | <b>Overall</b> |      |   |                |       |      |      |       |                 | <b>Mean</b> | 1971 | 2.1   | -              | -    | 1.48 | 26.3           | 0.06  | 0.4 $\pm$ 0.12 |      |       |                 |             |      |       |                |      |      |                |       |                |      |       |                 |             |      |      |                |   |      |      |      |                |  |  |  |             |      |     |
| 82             | 2017       | 1             | Laminate, rugs                 | t = 0             | 0.43                                            | 32.8                           | 0.013                              | 0.77                                                    |                |      |   |                  |       |      |      |       |                 |             |      |       |                |       |      |                |       |                 |       |       |                 |             |      |       |                |       |      |                |       |                 |       |       |                 |             |      |       |                |       |      |                |       |                 |       |       |                 |             |      |       |                |       |      |                |       |                 |       |       |                 |             |      |      |                |       |      |      |       |                 |       |      |       |             |      |     |                |       |      |      |       |                 |       |      |       |                |      |   |                |       |      |      |       |                 |             |      |       |                |      |      |                |       |                |      |       |                 |             |      |       |                |      |      |                |       |                |      |       |                 |             |      |      |                |   |      |      |      |                |  |  |  |             |      |     |
| 50             | 1954       | 2             | Hardwood, rugs                 | t = 0             | 2.08                                            | 25.3                           | 0.082                              | 0.38 $\pm$ 0.04                                         |                |      |   |                  |       |      |      |       |                 |             |      |       |                |       |      |                |       |                 |       |       |                 |             |      |       |                |       |      |                |       |                 |       |       |                 |             |      |       |                |       |      |                |       |                 |       |       |                 |             |      |       |                |       |      |                |       |                 |       |       |                 |             |      |      |                |       |      |      |       |                 |       |      |       |             |      |     |                |       |      |      |       |                 |       |      |       |                |      |   |                |       |      |      |       |                 |             |      |       |                |      |      |                |       |                |      |       |                 |             |      |       |                |      |      |                |       |                |      |       |                 |             |      |      |                |   |      |      |      |                |  |  |  |             |      |     |
|                |            |               |                                | t = 6             | 1.95                                            |                                | 0.077                              |                                                         | 43             | 1920 | 2 | Laminate, rugs   | t = 0 | 1.35 | 13.5 | 0.1   | 0.19 $\pm$ 0.06 | t = 6       | 1.38 | 0.102 | 35             | 1920  | 2    | Laminate, rugs | t = 0 | 2.38            | 27.0  | 0.088 | 0.58 $\pm$ 0.25 | t = 6       | 2.76 | 0.102 | 10             | 1985  | 2    | Bamboo, rugs   | t = 0 | 1.3             | 27.5  | 0.047 | 0.50 $\pm$ 0.15 | t = 6       | 1.13 | 0.041 | 59             | 2002  | 4    | Hardwood, rugs | t = 0 | 1.72            | 40.9  | 0.042 | 0.24 $\pm$ 0.04 | t = 6       | 1.28 | 0.031 | 01             | 1999  | 1    | Hardwood, rugs | t = 0 | 2.03            | 32.9  | 0.062 | 0.21 $\pm$ 0.02 | t = 6       | 1.64 | 0.05 | <b>Overall</b> |       |      |      |       |                 |       |      |       | <b>Mean</b> | 1971 | 2.1 | -              | -     | 1.48 | 26.3 | 0.06  | 0.4 $\pm$ 0.12  |       |      |       |                |      |   |                |       |      |      |       |                 |             |      |       |                |      |      |                |       |                |      |       |                 |             |      |       |                |      |      |                |       |                |      |       |                 |             |      |      |                |   |      |      |      |                |  |  |  |             |      |     |
| 43             | 1920       | 2             | Laminate, rugs                 | t = 0             | 1.35                                            | 13.5                           | 0.1                                | 0.19 $\pm$ 0.06                                         |                |      |   |                  |       |      |      |       |                 |             |      |       |                |       |      |                |       |                 |       |       |                 |             |      |       |                |       |      |                |       |                 |       |       |                 |             |      |       |                |       |      |                |       |                 |       |       |                 |             |      |       |                |       |      |                |       |                 |       |       |                 |             |      |      |                |       |      |      |       |                 |       |      |       |             |      |     |                |       |      |      |       |                 |       |      |       |                |      |   |                |       |      |      |       |                 |             |      |       |                |      |      |                |       |                |      |       |                 |             |      |       |                |      |      |                |       |                |      |       |                 |             |      |      |                |   |      |      |      |                |  |  |  |             |      |     |
|                |            |               |                                | t = 6             | 1.38                                            |                                | 0.102                              |                                                         | 35             | 1920 | 2 | Laminate, rugs   | t = 0 | 2.38 | 27.0 | 0.088 | 0.58 $\pm$ 0.25 | t = 6       | 2.76 | 0.102 | 10             | 1985  | 2    | Bamboo, rugs   | t = 0 | 1.3             | 27.5  | 0.047 | 0.50 $\pm$ 0.15 | t = 6       | 1.13 | 0.041 | 59             | 2002  | 4    | Hardwood, rugs | t = 0 | 1.72            | 40.9  | 0.042 | 0.24 $\pm$ 0.04 | t = 6       | 1.28 | 0.031 | 01             | 1999  | 1    | Hardwood, rugs | t = 0 | 2.03            | 32.9  | 0.062 | 0.21 $\pm$ 0.02 | t = 6       | 1.64 | 0.05  | <b>Overall</b> |       |      |                |       |                 |       |       |                 | <b>Mean</b> | 1971 | 2.1  | -              | -     | 1.48 | 26.3 | 0.06  | 0.4 $\pm$ 0.12  |       |      |       |             |      |     |                |       |      |      |       |                 |       |      |       |                |      |   |                |       |      |      |       |                 |             |      |       |                |      |      |                |       |                |      |       |                 |             |      |       |                |      |      |                |       |                |      |       |                 |             |      |      |                |   |      |      |      |                |  |  |  |             |      |     |
| 35             | 1920       | 2             | Laminate, rugs                 | t = 0             | 2.38                                            | 27.0                           | 0.088                              | 0.58 $\pm$ 0.25                                         |                |      |   |                  |       |      |      |       |                 |             |      |       |                |       |      |                |       |                 |       |       |                 |             |      |       |                |       |      |                |       |                 |       |       |                 |             |      |       |                |       |      |                |       |                 |       |       |                 |             |      |       |                |       |      |                |       |                 |       |       |                 |             |      |      |                |       |      |      |       |                 |       |      |       |             |      |     |                |       |      |      |       |                 |       |      |       |                |      |   |                |       |      |      |       |                 |             |      |       |                |      |      |                |       |                |      |       |                 |             |      |       |                |      |      |                |       |                |      |       |                 |             |      |      |                |   |      |      |      |                |  |  |  |             |      |     |
|                |            |               |                                | t = 6             | 2.76                                            |                                | 0.102                              |                                                         | 10             | 1985 | 2 | Bamboo, rugs     | t = 0 | 1.3  | 27.5 | 0.047 | 0.50 $\pm$ 0.15 | t = 6       | 1.13 | 0.041 | 59             | 2002  | 4    | Hardwood, rugs | t = 0 | 1.72            | 40.9  | 0.042 | 0.24 $\pm$ 0.04 | t = 6       | 1.28 | 0.031 | 01             | 1999  | 1    | Hardwood, rugs | t = 0 | 2.03            | 32.9  | 0.062 | 0.21 $\pm$ 0.02 | t = 6       | 1.64 | 0.05  | <b>Overall</b> |       |      |                |       |                 |       |       |                 | <b>Mean</b> | 1971 | 2.1   | -              | -     | 1.48 | 26.3           | 0.06  | 0.4 $\pm$ 0.12  |       |       |                 |             |      |      |                |       |      |      |       |                 |       |      |       |             |      |     |                |       |      |      |       |                 |       |      |       |                |      |   |                |       |      |      |       |                 |             |      |       |                |      |      |                |       |                |      |       |                 |             |      |       |                |      |      |                |       |                |      |       |                 |             |      |      |                |   |      |      |      |                |  |  |  |             |      |     |
| 10             | 1985       | 2             | Bamboo, rugs                   | t = 0             | 1.3                                             | 27.5                           | 0.047                              | 0.50 $\pm$ 0.15                                         |                |      |   |                  |       |      |      |       |                 |             |      |       |                |       |      |                |       |                 |       |       |                 |             |      |       |                |       |      |                |       |                 |       |       |                 |             |      |       |                |       |      |                |       |                 |       |       |                 |             |      |       |                |       |      |                |       |                 |       |       |                 |             |      |      |                |       |      |      |       |                 |       |      |       |             |      |     |                |       |      |      |       |                 |       |      |       |                |      |   |                |       |      |      |       |                 |             |      |       |                |      |      |                |       |                |      |       |                 |             |      |       |                |      |      |                |       |                |      |       |                 |             |      |      |                |   |      |      |      |                |  |  |  |             |      |     |
|                |            |               |                                | t = 6             | 1.13                                            |                                | 0.041                              |                                                         | 59             | 2002 | 4 | Hardwood, rugs   | t = 0 | 1.72 | 40.9 | 0.042 | 0.24 $\pm$ 0.04 | t = 6       | 1.28 | 0.031 | 01             | 1999  | 1    | Hardwood, rugs | t = 0 | 2.03            | 32.9  | 0.062 | 0.21 $\pm$ 0.02 | t = 6       | 1.64 | 0.05  | <b>Overall</b> |       |      |                |       |                 |       |       |                 | <b>Mean</b> | 1971 | 2.1   | -              | -     | 1.48 | 26.3           | 0.06  | 0.4 $\pm$ 0.12  |       |       |                 |             |      |       |                |       |      |                |       |                 |       |       |                 |             |      |      |                |       |      |      |       |                 |       |      |       |             |      |     |                |       |      |      |       |                 |       |      |       |                |      |   |                |       |      |      |       |                 |             |      |       |                |      |      |                |       |                |      |       |                 |             |      |       |                |      |      |                |       |                |      |       |                 |             |      |      |                |   |      |      |      |                |  |  |  |             |      |     |
| 59             | 2002       | 4             | Hardwood, rugs                 | t = 0             | 1.72                                            | 40.9                           | 0.042                              | 0.24 $\pm$ 0.04                                         |                |      |   |                  |       |      |      |       |                 |             |      |       |                |       |      |                |       |                 |       |       |                 |             |      |       |                |       |      |                |       |                 |       |       |                 |             |      |       |                |       |      |                |       |                 |       |       |                 |             |      |       |                |       |      |                |       |                 |       |       |                 |             |      |      |                |       |      |      |       |                 |       |      |       |             |      |     |                |       |      |      |       |                 |       |      |       |                |      |   |                |       |      |      |       |                 |             |      |       |                |      |      |                |       |                |      |       |                 |             |      |       |                |      |      |                |       |                |      |       |                 |             |      |      |                |   |      |      |      |                |  |  |  |             |      |     |
|                |            |               |                                | t = 6             | 1.28                                            |                                | 0.031                              |                                                         | 01             | 1999 | 1 | Hardwood, rugs   | t = 0 | 2.03 | 32.9 | 0.062 | 0.21 $\pm$ 0.02 | t = 6       | 1.64 | 0.05  | <b>Overall</b> |       |      |                |       |                 |       |       |                 | <b>Mean</b> | 1971 | 2.1   | -              | -     | 1.48 | 26.3           | 0.06  | 0.4 $\pm$ 0.12  |       |       |                 |             |      |       |                |       |      |                |       |                 |       |       |                 |             |      |       |                |       |      |                |       |                 |       |       |                 |             |      |      |                |       |      |      |       |                 |       |      |       |             |      |     |                |       |      |      |       |                 |       |      |       |                |      |   |                |       |      |      |       |                 |             |      |       |                |      |      |                |       |                |      |       |                 |             |      |       |                |      |      |                |       |                |      |       |                 |             |      |      |                |   |      |      |      |                |  |  |  |             |      |     |
| 01             | 1999       | 1             | Hardwood, rugs                 | t = 0             | 2.03                                            | 32.9                           | 0.062                              | 0.21 $\pm$ 0.02                                         |                |      |   |                  |       |      |      |       |                 |             |      |       |                |       |      |                |       |                 |       |       |                 |             |      |       |                |       |      |                |       |                 |       |       |                 |             |      |       |                |       |      |                |       |                 |       |       |                 |             |      |       |                |       |      |                |       |                 |       |       |                 |             |      |      |                |       |      |      |       |                 |       |      |       |             |      |     |                |       |      |      |       |                 |       |      |       |                |      |   |                |       |      |      |       |                 |             |      |       |                |      |      |                |       |                |      |       |                 |             |      |       |                |      |      |                |       |                |      |       |                 |             |      |      |                |   |      |      |      |                |  |  |  |             |      |     |
|                |            |               |                                | t = 6             | 1.64                                            |                                | 0.05                               |                                                         | <b>Overall</b> |      |   |                  |       |      |      |       |                 | <b>Mean</b> | 1971 | 2.1   | -              | -     | 1.48 | 26.3           | 0.06  | 0.4 $\pm$ 0.12  |       |       |                 |             |      |       |                |       |      |                |       |                 |       |       |                 |             |      |       |                |       |      |                |       |                 |       |       |                 |             |      |       |                |       |      |                |       |                 |       |       |                 |             |      |      |                |       |      |      |       |                 |       |      |       |             |      |     |                |       |      |      |       |                 |       |      |       |                |      |   |                |       |      |      |       |                 |             |      |       |                |      |      |                |       |                |      |       |                 |             |      |       |                |      |      |                |       |                |      |       |                 |             |      |      |                |   |      |      |      |                |  |  |  |             |      |     |
| <b>Overall</b> |            |               |                                |                   |                                                 |                                |                                    |                                                         |                |      |   |                  |       |      |      |       |                 |             |      |       |                |       |      |                |       |                 |       |       |                 |             |      |       |                |       |      |                |       |                 |       |       |                 |             |      |       |                |       |      |                |       |                 |       |       |                 |             |      |       |                |       |      |                |       |                 |       |       |                 |             |      |      |                |       |      |      |       |                 |       |      |       |             |      |     |                |       |      |      |       |                 |       |      |       |                |      |   |                |       |      |      |       |                 |             |      |       |                |      |      |                |       |                |      |       |                 |             |      |       |                |      |      |                |       |                |      |       |                 |             |      |      |                |   |      |      |      |                |  |  |  |             |      |     |
| <b>Mean</b>    | 1971       | 2.1           | -                              | -                 | 1.48                                            | 26.3                           | 0.06                               | 0.4 $\pm$ 0.12                                          |                |      |   |                  |       |      |      |       |                 |             |      |       |                |       |      |                |       |                 |       |       |                 |             |      |       |                |       |      |                |       |                 |       |       |                 |             |      |       |                |       |      |                |       |                 |       |       |                 |             |      |       |                |       |      |                |       |                 |       |       |                 |             |      |      |                |       |      |      |       |                 |       |      |       |             |      |     |                |       |      |      |       |                 |       |      |       |                |      |   |                |       |      |      |       |                 |             |      |       |                |      |      |                |       |                |      |       |                 |             |      |       |                |      |      |                |       |                |      |       |                 |             |      |      |                |   |      |      |      |                |  |  |  |             |      |     |

## 109 Section S3: Quality Assurance and Quality Control

110 **Table S3.** Analytical Detection Limits (ADLs) were calculated following EPA methodology and repeating  
 111 the lowest calibration standard (0.2 ng mL<sup>-1</sup> or 1 ng mL<sup>-1</sup>) seven times. The standard deviation ( $\sigma$ ) of the  
 112 seven runs is then multiplied by the Student's t-value for a single-tailed 99<sup>th</sup> percentile *t* statistic. The ADL  
 113 was converted from extract concentrations (ng mL<sup>-1</sup>) to surface concentrations (pg of PFAS per cm<sup>2</sup> of  
 114 surface) using the average of the GS wiped in homes (930.3 cm<sup>2</sup>).

115

| PFAS         | ADL (ng mL <sup>-1</sup> ) | Dust<br>ADL (ng g <sup>-1</sup> ) | Surface Wipes<br>ADL (pg cm <sup>-2</sup> ) | Tap Water<br>ADL (ng L <sup>-1</sup> ) |
|--------------|----------------------------|-----------------------------------|---------------------------------------------|----------------------------------------|
| PFBA         | 0.03                       | 0.02                              | 3.2E-03                                     | 0.003                                  |
| PFPeA        | 0.02                       | 0.01                              | 2.1E-03                                     | 0.002                                  |
| PFHxA        | 0.02                       | 0.01                              | 2.1E-03                                     | 0.002                                  |
| PFHpA        | 0.03                       | 0.02                              | 3.2E-03                                     | 0.003                                  |
| PFOA         | 0.04                       | 0.03                              | 4.3E-03                                     | 0.004                                  |
| PFNA         | 0.03                       | 0.02                              | 3.2E-03                                     | 0.003                                  |
| PFDA         | 0.02                       | 0.01                              | 2.1E-03                                     | 0.002                                  |
| PFUnA        | 0.04                       | 0.03                              | 4.3E-03                                     | 0.004                                  |
| PFDoA        | 0.08                       | 0.06                              | 8.6E-03                                     | 0.008                                  |
| PFTTrA*      | 0.48                       | 0.35                              | 5.2E-02                                     | 0.048                                  |
| PFTA*        | 0.3                        | 0.22                              | 3.2E-02                                     | 0.03                                   |
| PFHxDA*      | 0.7                        | 0.51                              | 7.5E-02                                     | 0.07                                   |
| PFODA*       | 0.51                       | 0.37                              | 5.5E-02                                     | 0.051                                  |
| L-PFBS       | 0.04                       | 0.03                              | 4.3E-03                                     | 0.004                                  |
| L-PFPeS      | 0.12                       | 0.09                              | 1.3E-02                                     | 0.012                                  |
| L-PFHxS      | 0.07                       | 0.05                              | 7.5E-03                                     | 0.007                                  |
| L-PFHpS      | 0.1                        | 0.07                              | 1.1E-02                                     | 0.01                                   |
| L-PFOS       | 0.06                       | 0.04                              | 6.4E-03                                     | 0.006                                  |
| L-PFNS       | 0.04                       | 0.03                              | 4.3E-03                                     | 0.004                                  |
| L-PFDS       | 0.12                       | 0.09                              | 1.3E-02                                     | 0.012                                  |
| L-PFDoS*     | 0.42                       | 0.30                              | 4.5E-02                                     | 0.042                                  |
| GenX         | 0.47                       | 0.34                              | 5.1E-02                                     | 0.047                                  |
| 6:2 monoPAP* | 0.59                       | 0.43                              | 6.3E-02                                     | 0.059                                  |
| 8:2 monoPAP* | 0.7                        | 0.51                              | 7.5E-02                                     | 0.07                                   |
| 6:2 diPAP*   | 0.7                        | 0.51                              | 7.5E-02                                     | 0.07                                   |
| 8:2 diPAP*   | 0.74                       | 0.54                              | 8.0E-02                                     | 0.074                                  |

116 \* indicates that the ADL was calculated using a 1 ng mL<sup>-1</sup> calibration standard



117 **Table S4.** Analytical precision for ionic PFAS collected on Kimwipes (surface wipes), settled dust, and tap  
 118 water is expressed as a pooled coefficient of variation (CV) of duplicate analyses (n = 17 duplicate pairs).  
 119 For each PFAS compound, analytical precision was calculated by dividing the pooled standard deviation

120 ( $\sigma_{\text{pooled}}$ ) by the mean of all duplicate analyses. For paired data,  $\sigma_{\text{pooled}} = \sqrt{\sum d_i^2 / 2n}$  where d is the  
 121 difference between paired, *i*, values, and n is the number of pairs.  
 122

| PFAS        | Analytical Precision (CV) [%] |      |           |
|-------------|-------------------------------|------|-----------|
|             | Surface Wipes                 | Dust | Tap Water |
| PFBA        | 0.3                           | 13.0 | 11.5      |
| PFPeA       | 7.5                           | 13.6 | 4.2       |
| PFBS        | 0.1                           | 13.1 | 2.9       |
| PFHxA       | 12.5                          | 14.9 | 1.5       |
| GenX        | 0.1                           | 24.0 | 17.5      |
| PFPeS       | -                             | 18.7 | 9.4       |
| PFHpA       | 8.8                           | 11.8 | 1.6       |
| PFHxS       | 20.5                          | 13.1 | 8.8       |
| PFOA        | 6.0                           | 14.5 | 2.4       |
| PFHpS       | 1.5                           | 21.2 | 26.2      |
| PFNA        | 1.9                           | 11.4 | 10.0      |
| PFOS        | 5.4                           | 9.6  | 21.3      |
| PFDA        | 4.2                           | 21.2 | 10.2      |
| PFNS        | -                             | 18.8 | 6.6       |
| PFUnA       | 5.0                           | 12.4 | 28.8      |
| PFDS        | 4.3                           | 12.0 | 19.2      |
| PFDoA       | 6.5                           | 14.9 | 20.6      |
| PFTTrA      | 2.0                           | 15.0 | 13.1      |
| PFDoS       | -                             | 11.5 | 41.0      |
| PFTA        | -                             | 30.3 | 33.2      |
| PFHxDA      | -                             | 21.3 | 15.8      |
| PFODA       | -                             | 11.2 | 6.7       |
| 6:2 diPAP   | 43.2                          | 69.8 | -*        |
| 8:2 diPAP   | 76.4                          | 46.4 | -*        |
| 6:2 monoPAP | 2.5                           | 13.2 | -*        |
| 8:2 monoPAP | 37.9                          | 11.0 | -*        |

123 \*Analytical precision for 6:2 and 8:2 mono- and diPAP s were not calculated for tap water due to poor  
 124 recovery.

125 **Table S5.** Average recovery for dust samples (n = 6) was determined by spiking residential dust sieved to  
 126 < 500 um with 45 ng of mass-labeled PFAS (i.e., PFAS internal standard). Not all targeted PFAS have  
 127 matching internal standards (IS). The standard deviation for PFAS marked with “\*” were greater than 25%  
 128 and results should be interpreted carefully.

129

| <b>PFAS</b>     | <b>Mean (%)</b> | <b>SD (%)</b> |
|-----------------|-----------------|---------------|
| PFBA IS         | 73.8            | 12.2          |
| PFPeA IS        | 84.3            | 16.9          |
| PFBS IS         | 87.3            | 21.6          |
| PFHxA IS        | 71.2            | 15.0          |
| GenX IS         | 85.0            | 15.8          |
| PFHpA IS        | 70.0            | 13.4          |
| PFHxS IS*       | 125.4           | 39.8          |
| PFOA IS         | 76.3            | 13.0          |
| PFNA IS         | 63.1            | 15.4          |
| PFOS IS         | 65.4            | 16.0          |
| PFDA IS         | 52.2            | 17.8          |
| PFUnA IS        | 65.9            | 9.1           |
| PFDoA IS        | 71.6            | 15.8          |
| PFTA IS         | 68.9            | 16.0          |
| 6:2 diPAP IS    | 68.7            | 24.6          |
| 8:2 diPAP IS*   | 172.3           | 84.4          |
| 6:2 monoPAP IS* | 96.8            | 34.8          |
| 8:2 monoPAP IS* | 149.6           | 61.2          |

130

131 **Table S6.** Average recovery and storage recovery for tap water samples. Average recovery was  
 132 determined by spiking 1 L of MilliQ water with 1 ng of PFAS standards. Three storage blanks were also  
 133 extracted to assess the effect of storage time on PFAS recovery. Three 1 L bottles of MilliQ water were  
 134 spiked with 1 ng of analyte PFAS and stored at -80°C with the field collected samples in March 2022. The  
 135 four PAPs (6:2 monoPAP, 8:2 monoPAP, 6:2 diPAP, and 8:2 diPAP) were excluded from analysis due to  
 136 poor recoveries, which are provided below for reference.

137

| <b>PFAS</b> | <b>Recovery (%)</b> | <b>Storage Recovery (%)</b> |
|-------------|---------------------|-----------------------------|
| PFBA        | 85.8                | 57.2                        |
| PFPeA       | 91.6                | 72.9                        |
| PFBS        | 96.5                | 79.8                        |
| PFHxA       | 88.2                | 64.9                        |
| GenX        | 87.8                | 68.2                        |
| PFPeS       | 82.0                | 83.1                        |
| PFHpA       | 64.7                | 83.2                        |
| PFHxS       | 99.4                | 85.1                        |
| PFOA        | 89.5                | 69.7                        |
| PFHpS       | 88.5                | 56.9                        |
| PFNA        | 85.0                | 60.7                        |
| PFOS        | 57.2                | 44.4                        |
| PFDA        | 75.9                | 40.1                        |
| PFNS        | 56.5                | 10.1                        |
| PFUnA       | 48.6                | 9.2                         |
| PFDS        | 45.6                | 3.8                         |
| PFDoA       | 48.1                | 3.3                         |
| PFTTrA      | 42.8                | 4.3                         |
| PFDoS       | 48.7                | 30.6                        |
| PFTA        | 64.3                | 15.1                        |
| PFHxDA      | 75.8                | 45.8                        |
| PFODA       | 37.6                | 28.0                        |
| 6:2 diPAP   | 173.5               | 6.6                         |
| 8:2 diPAP   | 1065.7              | 77.9                        |
| 6:2 monoPAP | 115.9               | 91.3                        |
| 8:2 monoPAP | -                   | 16.3                        |

138

139 **Table S7.** Kimwipe extraction efficiencies (N = 8) for the 26 targeted ionic PFAS were calculated by spiking  
 140 each Kimwipe with 10  $\mu\text{L}$  of 100  $\text{ng mL}^{-1}$  analyte standard. Kimwipes were extracted following the same  
 141 method for samples and blanks. Recovery was calculated by dividing the calculated concentration from  
 142 each Kimwipe by the expected concentration (10  $\text{ng mL}^{-1}$ ).  
 143

| Analyte     | Recovery (%) | SD (%) |
|-------------|--------------|--------|
| PFBA        | 85.7         | 15.0   |
| PFPeA       | 62.5         | 7.1    |
| PFBS        | 64.3         | 9.0    |
| PFHxA       | 63.0         | 6.8    |
| GenX        | 69.7         | 2.6    |
| PFPeS       | 67.0         | 11.3   |
| PFHpA       | 56.2         | 9.5    |
| PFHxS       | 64.3         | 13.6   |
| PFOA        | 45.4         | 6.8    |
| PFHpS       | 76.6         | 8.1    |
| PFNA        | 41.0         | 6.7    |
| PFOS        | 37.8         | 5.7    |
| PFDA        | 29.0         | 3.7    |
| PFNS        | 18.8         | 4.0    |
| PFUnA       | 14.9         | 4.2    |
| PFDS        | 13.7         | 3.1    |
| PFDoA       | 16.2         | 2.5    |
| PFTTrA      | 6.5          | 1.8    |
| PFDoS       | 14.1         | 4.3    |
| PFTA        | 22.4         | 1.8    |
| PFHxDA      | 53.9         | 7.9    |
| PFODA       | 66.4         | 8.5    |
| 6:2 diPAP   | 26.2         | 2.0    |
| 8:2 diPAP   | 22.2         | 31.7   |
| 6:2 monoPAP | 38.3         | 8.4    |
| 8:2 monoPAP | 10.1         | 12.6   |

## 145 Section S4: Exposure Assessment Parameters

146 **Table S8.** Exposure parameters and equations used to calculate intake. Dust loading was calculated for the homes that participated in the IPA  
 147 Campaign by dividing the average mass of dust vacuumed by the floor area that was vacuumed.

| Exposure Route                                  | Sample Media       | Daily Intake (DI) Equation (ng day <sup>-1</sup> kg <sup>-1</sup> )             | Parameters                                   |          |          | Units                               | References for Parameters                      |
|-------------------------------------------------|--------------------|---------------------------------------------------------------------------------|----------------------------------------------|----------|----------|-------------------------------------|------------------------------------------------|
|                                                 |                    |                                                                                 |                                              | Adult    | 2-yr old |                                     |                                                |
| Fine PM & Gas-Phase Inhalation <sup>7</sup>     |                    | DI = C <sub>air</sub> * IR * AF / BW                                            | Body Weight (BW)                             | 70.8     | 13.2     | kg                                  | Table 8-10 EFH Chapter 8 <sup>7</sup>          |
|                                                 |                    |                                                                                 | Inhalation Rate (IR)                         | 15.7     | 8        | m <sup>3</sup> d <sup>-1</sup>      | Table 6-1 - EFH Chapter 6 <sup>7</sup>         |
|                                                 |                    |                                                                                 | Absorption Fraction (AF)                     | 0.5      | 0.5      | -                                   | East et al., 2021 <sup>8</sup>                 |
|                                                 |                    |                                                                                 | Air Concentration (C <sub>air</sub> )        | Measured |          | ng m <sup>-3</sup>                  | IPA Campaign                                   |
| Air to Skin Dermal Uptake <sup>9,10</sup>       | QFFs; PUF-XAD2-PUF | DI = C <sub>air</sub> * k <sub>p,g</sub> * SA <sub>body</sub> * T / BW          | k <sub>p,g</sub> - FOSA/FOSE                 | 0.18     | 0.18     | m h <sup>-1</sup>                   | Kissel et al., 2023 <sup>10</sup>              |
|                                                 |                    |                                                                                 | k <sub>p,g</sub> - PFAAs                     | 4.4E-7   | 4.4E-7   | m h <sup>-1</sup>                   | Franko et al., 2012 <sup>11</sup>              |
|                                                 |                    |                                                                                 | SA <sub>body</sub>                           | 1.93     | 0.53     | m <sup>2</sup>                      | Table 7-9; EFH Chapter 7 <sup>7</sup>          |
|                                                 |                    |                                                                                 | Duration of Exposure (T)                     | 12       | 12       | h d <sup>-1</sup>                   | Estimate                                       |
|                                                 |                    |                                                                                 | Water Concentration (C <sub>water</sub> )    | Measured |          | ng L <sup>-1</sup>                  | IPA Campaign                                   |
| Water Ingestion <sup>7</sup>                    | Tap Water          | DI = C <sub>water</sub> * IR * AF / BW                                          | Ingestion Rate (IR)                          | 1.277    | 0.245    | L d <sup>-1</sup>                   | Table 3-1 - EFH Chapter 3 <sup>7</sup>         |
| Dietary Ingestion <sup>7</sup>                  | Literature         | DI = IR / BW                                                                    | Absorption Fraction (AF)                     | 0.9      | 0.9      | -                                   | East et al., 2021 <sup>8</sup>                 |
|                                                 |                    |                                                                                 | Intake Rate (IR)                             | 250      | 250      | ng d <sup>-1</sup>                  | Tittlemier et al., 2007 <sup>12</sup>          |
| Dust Ingestion <sup>7</sup>                     |                    | DI = C <sub>dust</sub> * IR * AF / BW                                           | Dust Concentration (C <sub>dust</sub> )      | Measured |          | ng g <sup>-1</sup>                  | IPA Campaign                                   |
|                                                 |                    |                                                                                 | Ingestion Rate (IR)                          | 0.02     | 0.05     | gd <sup>-1</sup>                    | Table 5-1 - EFH Chapter 5 <sup>7</sup>         |
| Dust Direct Contact Absorption <sup>8</sup>     | Settled Dust       | DI = C <sub>dust</sub> * DL * TC * T * AF / BW                                  | Absorption Fraction (AF)                     | 0.9      | 0.9      | -                                   | East et al., 2021 <sup>8</sup>                 |
|                                                 |                    |                                                                                 | Dust Load (DL)                               | 0.066    | 0.066    | g m <sup>-2</sup>                   | IPA Campaign                                   |
|                                                 |                    |                                                                                 | Transfer coefficient (TC)                    | 0.06     | 0.06     | m <sup>2</sup> h <sup>-1</sup>      | Hubal Cohen et al., 2006 <sup>13</sup>         |
|                                                 |                    |                                                                                 | Time doing activity (T)                      | 8        | 10       | h d <sup>-1</sup>                   | Estimate                                       |
|                                                 |                    |                                                                                 | Absorption Fraction (AF)                     | 0.048    | 0.048    | %                                   | Fasano et al., 2005 <sup>14</sup>              |
| Surface Direct Contact Absorption <sup>15</sup> |                    | DI = C <sub>surface</sub> * F <sub>t</sub> * %Hand * TC * ET * AF / BW          | Surface Film Conc. (C <sub>surface</sub> )   | Measured |          | ng cm <sup>-2</sup>                 | IPA Campaign                                   |
|                                                 |                    |                                                                                 | % of SA <sub>skin</sub> that is Hand (%Hand) | 5.2      | 5.7      | %                                   | Table 7-6; EFH Chapter 7 <sup>7</sup>          |
|                                                 |                    |                                                                                 | Fraction Transferred (F <sub>t</sub> )       | 0.08     | 0.08     | -                                   | US EPA 2012 <sup>15</sup>                      |
|                                                 |                    |                                                                                 | Transfer coefficient (TC)                    | 600      | 600      | cm <sup>2</sup> h <sup>-1</sup>     | Cohen Hubal et al., 2006 <sup>13</sup>         |
|                                                 |                    |                                                                                 | Exposure Time (ET)                           | 8        | 12       | h d <sup>-1</sup>                   | Estimate                                       |
| Surface Hand to Mouth Ingestion <sup>7</sup>    | Glass Slabs        | DI = C <sub>surface</sub> * CR * EV * T * DT * F <sub>hand</sub> * AF / BW / 60 | Absorption Fraction (AF)                     | 0.048    | 0.048    | %                                   | Fasano et al., 2005 <sup>14</sup>              |
|                                                 |                    |                                                                                 | Contact Rate (CR)                            | -        | 302.1    | cm <sup>2</sup> event <sup>-1</sup> | Calculated (SA <sub>skin</sub> * % Hand)       |
|                                                 |                    |                                                                                 | Event Frequency (EV)                         | -        | 20       | event h <sup>-1</sup>               | Adults - Nicas and Best 2008 <sup>16</sup> ;   |
| Surface Hand to Mouth Ingestion <sup>7</sup>    |                    | DI = C <sub>surface</sub> * CR * EV * T * DT * F <sub>hand</sub> * AF / BW / 60 | Time doing activity (T)                      | -        | 12       | h d <sup>-1</sup>                   | 2-yr old -Table 4-1 EFH Chapter 4 <sup>7</sup> |
|                                                 |                    |                                                                                 | Absorption Fraction (AF)                     | -        | 0.9      | -                                   | Estimate                                       |
|                                                 |                    |                                                                                 | Duration of Activity (DT)                    | -        | 7        | min h <sup>-1</sup>                 | East et al., 2021 <sup>8</sup>                 |
|                                                 |                    |                                                                                 |                                              |          |          |                                     | Table 4-1; EFH Chapter 4 <sup>7</sup>          |

|                                                 |          |                                                                      |                                                                |     |          |                     |                                        |
|-------------------------------------------------|----------|----------------------------------------------------------------------|----------------------------------------------------------------|-----|----------|---------------------|----------------------------------------|
| Ingestion by Mouthing<br>Clothing <sup>17</sup> | Clothing | $DI = C_{Cloth} * A_{Mouth} * n * f_{Hand} * AF * Ext_{Saliva} / BW$ | Fraction of hand mouthed ( $F_{hand}$ )                        | -   | 0.13     | -                   |                                        |
|                                                 |          |                                                                      | Clothing Concentration ( $C_{Cloth}$ )                         | -   | Measured | ng cm <sup>-2</sup> | IPA Campaign                           |
|                                                 |          |                                                                      | Area of mouth ( $A_{Mouth}$ )                                  | -   | 10       | cm <sup>2</sup>     | Gennings et al., 2014 <sup>18</sup>    |
|                                                 |          |                                                                      | Number of times mouthed (n)                                    | -   | 124      | d <sup>-1</sup>     | Morrison et al., 2015 <sup>17</sup>    |
|                                                 |          |                                                                      | Fraction of surface mass<br>transferred to hand ( $f_{hand}$ ) | -   | 0.058    | -                   | Morrison et al., 2015 <sup>17</sup>    |
|                                                 |          |                                                                      | Absorption Fraction (AF)                                       | -   | 0.9      | -                   | East et al., 2021 <sup>8</sup>         |
|                                                 |          |                                                                      | Extraction by Saliva ( $Ext_{Saliva}$ )                        | -   | 0.48     | -                   | US EPA, 2012 <sup>15</sup>             |
| <b>Biotransformation</b>                        |          |                                                                      |                                                                |     |          |                     |                                        |
|                                                 |          |                                                                      | 8:2 FTOH to PFOA                                               | 0.5 | 0.5      | %                   | Himmelstein et al., 2012 <sup>19</sup> |

148 EFH refers to the EPA Exposure Factors Handbok (EFH).

149 Section S5. Results

150

151 **Table S9.** Summary statistics for tap water samples, which were mean field blank-subtracted and  
 152 corrected for recoveries. PFAS concentrations noted with “n.d.” indicate a non-detect and values with a  
 153 “<” in front indicate that the PFAS was detected at concentrations below the MDL.

154

| PFAS   | Mean (ng L <sup>-1</sup> ) | Median (ng L <sup>-1</sup> ) | Min (ng L <sup>-1</sup> ) | Max (ng L <sup>-1</sup> ) | DF (%) | MDL (ng L <sup>-1</sup> ) |
|--------|----------------------------|------------------------------|---------------------------|---------------------------|--------|---------------------------|
| GenX   | < 0.047                    | n.d.                         | n.d.                      | 0.06                      | 20     | 0.047                     |
| PFBA   | 1.53                       | 1.31                         | < 0.694                   | 2.93                      | 100    | 0.694                     |
| PFBS   | 2.72                       | 2.66                         | < 0.715                   | 4.80                      | 100    | 0.715                     |
| PFDA   | 0.11                       | 0.06                         | n.d.                      | 0.26                      | 90     | 0.002                     |
| PFDoA  | < 0.048                    | n.d.                         | n.d.                      | < 0.048                   | 30     | 0.048                     |
| PFDoS  | n.d.                       | n.d.                         | n.d.                      | n.d.                      | n.d.   | 0.042                     |
| PFDS   | n.d.                       | n.d.                         | n.d.                      | n.d.                      | n.d.   | 0.012                     |
| PFHpA  | 1.57                       | 1.65                         | < 0.003                   | 3.58                      | 100    | 0.003                     |
| PFHpS  | 0.08                       | 0.07                         | 0.07                      | 0.14                      | 100    | 0.068                     |
| PFHxA  | 1.41                       | 0.62                         | n.d.                      | 4.29                      | 90     | 0.004                     |
| PFHxDA | n.d.                       | n.d.                         | n.d.                      | n.d.                      | n.d.   | 0.051                     |
| PFHxS  | 0.32                       | 0.23                         | n.d.                      | 0.82                      | 90     | 0.181                     |
| PFNA   | 0.15                       | 0.18                         | n.d.                      | 0.26                      | 90     | 0.011                     |
| PFNS   | n.d.                       | n.d.                         | n.d.                      | n.d.                      | n.d.   | 0.004                     |
| PFOA   | 3.60                       | 3.76                         | < 0.075                   | 8.19                      | 100    | 0.075                     |
| PFODA  | n.d.                       | n.d.                         | n.d.                      | n.d.                      | n.d.   | 0.004                     |
| PFOS   | 2.95                       | 2.75                         | n.d.                      | 6.51                      | 80     | 0.008                     |
| PFPeA  | 1.26                       | 0.11                         | n.d.                      | 6.51                      | 60     | 0.002                     |
| PFPeS  | 0.18                       | n.d.                         | n.d.                      | 0.99                      | 20     | 0.007                     |
| PFTA   | 0.08                       | 0.07                         | n.d.                      | 0.15                      | 90     | 0.07                      |
| PFTTrA | n.d.                       | n.d.                         | n.d.                      | n.d.                      | n.d.   | 0.03                      |
| PFUnA  | 0.02                       | 0.02                         | n.d.                      | 0.07                      | 60     | 0.008                     |

155

156 **Table S10.** Summary statistics, method detection limit (MDL), mean field blank, and detection frequencies  
 157 (DF) for mean field blank subtracted and recovery corrected targeted ionic PFAS on 6-month glass slab  
 158 wipes. PFAS concentrations noted with “n.d.” indicate a non-detect and values with a “<” in front indicate  
 159 that the PFAS was detected at concentrations below the MDL.  
 160

| PFAS        | Mean                   | Median  | Min      | Max      | MDL     | Mean Field Blank | DF   |
|-------------|------------------------|---------|----------|----------|---------|------------------|------|
|             | (pg cm <sup>-2</sup> ) |         |          |          |         |                  | %    |
| PFBA        | 0.63                   | <0.48   | n.d.     | 2.0      | 0.48    | 8.9E-02          | 78   |
| PFPeA       | 2.3E-02                | <2.1E-3 | n.d.     | 9.8E-02  | 2.1E-03 | n.d.             | 44   |
| PFBS        | <4.3E-3                | <4.3E-3 | n.d.     | 2.4E-02  | 4.3E-03 | 1.3E-04          | 11   |
| PFHxA       | 0.49                   | 0.14    | 2.70E-02 | 2.6      | 1.8E-02 | 3.9E-03          | 100  |
| GenX        | <5.1E-2                | <5.1E-2 | n.d.     | <5.1E-02 | 5.1E-02 | 3.6E-03          | n.d. |
| PFPeS       | n.d.                   | n.d.    | n.d.     | n.d.     | 1.3E-02 | n.d.             | n.d. |
| PFHpA       | 0.25                   | 0.15    | 1.90E-02 | 0.94     | 6.5E-03 | 1.3E-03          | 100  |
| PFHxS       | n.d.                   | n.d.    | n.d.     | n.d.     | 0.59    | 3.9E-03          | n.d. |
| PFOA        | 0.78                   | 0.63    | 3.10E-02 | 1.7      | 1.6E-02 | 2.0E-03          | 100  |
| PFHpS       | 9.3E-02                | <7.1E-2 | <7.1E-2  | 0.25     | 7.1E-02 | 1.1E-02          | 100  |
| PFNA        | 0.15                   | 0.14    | n.d.     | 0.45     | 6.6E-03 | n.d.             | 67   |
| PFOS        | 0.14                   | 0.15    | n.d.     | 0.26     | 5.6E-02 | 1.1E-02          | 89   |
| PFDA        | 0.14                   | 0.15    | 1.90E-02 | 0.37     | 7.1E-03 | 1.3E-03          | 100  |
| PFNS        | n.d.                   | n.d.    | n.d.     | n.d.     | 6.7E-03 | n.d.             | n.d. |
| PFUnA       | 2.0E-02                | <7.8E-3 | n.d.     | 5.5E-02  | 7.8E-03 | 6.6E-04          | 67   |
| PFDS        | n.d.                   | n.d.    | n.d.     | n.d.     | 2.2E-02 | 6.2E-03          | n.d. |
| PFDoA       | <6.3E-2                | <6.3E-2 | n.d.     | 0.12     | 6.3E-02 | 9.8E-04          | 56   |
| PFTrA       | n.d.                   | n.d.    | n.d.     | n.d.     | 5.2E-2  | 3.3E-05          | n.d. |
| PFDoS       | n.d.                   | n.d.    | n.d.     | n.d.     | 4.5E-02 | n.d.             | n.d. |
| PFTA        | <5.6E-2                | <5.6E-2 | n.d.     | 0.13     | 5.6E-02 | 4.6E-03          | 22   |
| PFHxDA      | n.d.                   | n.d.    | n.d.     | n.d.     | 8.9E-02 | 4.5E-03          | n.d. |
| PFODA       | n.d.                   | n.d.    | n.d.     | n.d.     | 5.5E-2  | n.d.             | n.d. |
| 6:2 diPAP   | 1.7                    | <0.85   | n.d.     | 9.4      | 0.85    | 8.7E-02          | 67   |
| 8:2 diPAP   | <0.14                  | <0.14   | n.d.     | <0.14    | 0.14    | 3.9E-03          | 67   |
| 6:2 monoPAP | 0.1                    | <6.3E-2 | n.d.     | 0.71     | 6.3E-02 | 3.3E-03          | 22   |
| 8:2 monoPAP | 0.14                   | <7.5E-2 | n.d.     | 1.0      | 7.5E-2  | 3.5E-03          | 33   |

161



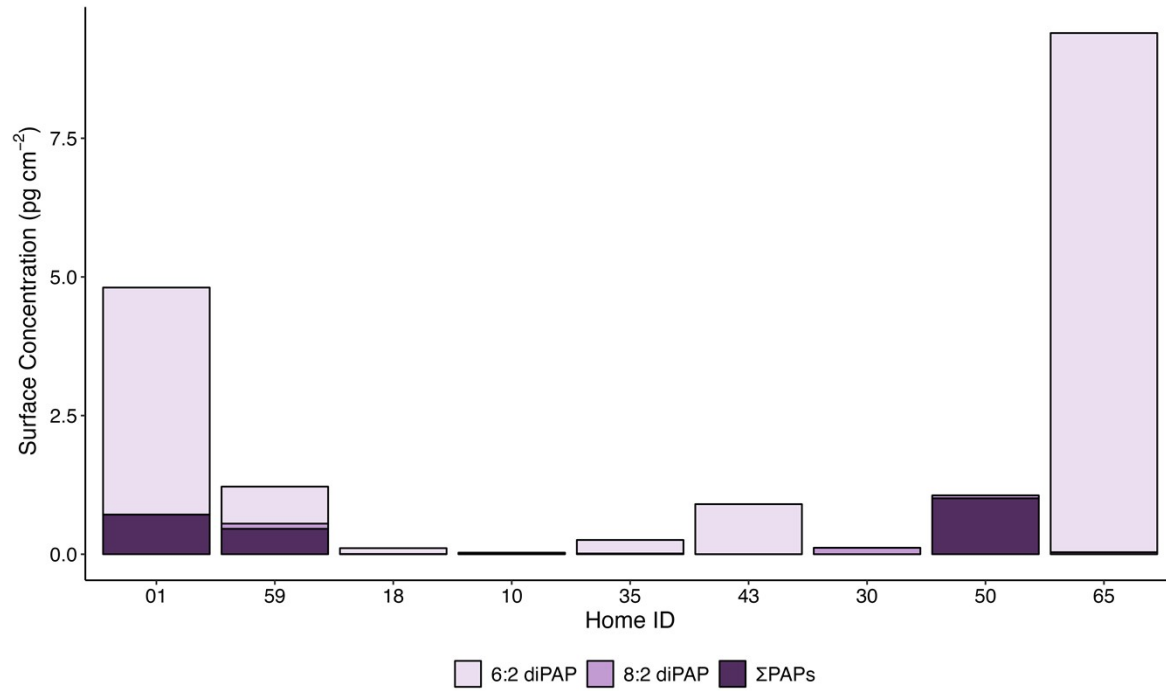

162

163 **Figure S2.** PAP profiles and concentrations on glass slabs collected at 6-months.

164 **Table S11.** Overall summary statistics for recovery corrected dust samples. Values are median blank  
 165 subtracted and the MDL was taken as the 95<sup>th</sup> percentile concentration following UC Davis' IMPROVE  
 166 methodology.<sup>20</sup> PFAS concentrations noted with "n.d." indicate a non-detect and values with a "<" in front  
 167 indicate that the PFAS was detected at concentrations below the MDL.  
 168

| <b>PFAS</b> | <b>Mean<br/>(ng g<sup>-1</sup>)</b> | <b>Median<br/>(ng g<sup>-1</sup>)</b> | <b>Min<br/>(ng g<sup>-1</sup>)</b> | <b>Max<br/>(ng g<sup>-1</sup>)</b> | <b>F.Blk<br/>(ng g<sup>-1</sup>)</b> | <b>DF<br/>(%)</b> | <b>MDL<br/>(ng g<sup>-1</sup>)</b> |
|-------------|-------------------------------------|---------------------------------------|------------------------------------|------------------------------------|--------------------------------------|-------------------|------------------------------------|
| PFBA        | 28.0                                | 9.2                                   | n.d.                               | 284                                | n.d.                                 | 76                | 4.6                                |
| PFPeA       | 0.6                                 | n.d.                                  | n.d.                               | 3.6                                | n.d.                                 | 43                | 0.25                               |
| PFBS        | <4.8                                | <4.8                                  | n.d.                               | 22.5                               | 3.4                                  | 10                | 4.8                                |
| PFHxA       | 9.0                                 | 7.2                                   | <3.6                               | 30.3                               | n.d.                                 | 62                | 3.6                                |
| GenX        | n.d.                                | n.d.                                  | n.d.                               | n.d.                               | n.d.                                 | n.d.              | 0.39                               |
| PFPeS       | n.d.                                | n.d.                                  | n.d.                               | n.d.                               | n.d.                                 | n.d.              | 0.06                               |
| PFHpA       | 1.6                                 | <1.1                                  | n.d.                               | 9.7                                | n.d.                                 | 38                | 1.1                                |
| PFHxS       | 1.4                                 | n.d.                                  | n.d.                               | 19.9                               | n.d.                                 | 10                | 0.06                               |
| PFOA        | 8.0                                 | 8.3                                   | n.d.                               | 31.4                               | n.d.                                 | 81                | 0.04                               |
| PFHpS       | <0.66                               | n.d.                                  | n.d.                               | 1.6                                | n.d.                                 | 5                 | 0.66                               |
| PFNA        | n.d.                                | n.d.                                  | n.d.                               | n.d.                               | n.d.                                 | n.d.              | 0.03                               |
| PFOS        | 129                                 | 80.8                                  | <37.1                              | 402                                | 0.9                                  | 76                | 37.1                               |
| PFDA        | 0.5                                 | n.d.                                  | n.d.                               | 2.6                                | n.d.                                 | 38                | 0.03                               |
| PFNS        | 0.1                                 | n.d.                                  | n.d.                               | 1.7                                | n.d.                                 | 5                 | 0.04                               |
| PFUnA       | n.d.                                | n.d.                                  | n.d.                               | n.d.                               | n.d.                                 | n.d.              | 0.09                               |
| PFDS        | <11.1                               | n.d.                                  | n.d.                               | 76.0                               | n.d.                                 | 10                | 11.1                               |
| PFDoA       | n.d.                                | n.d.                                  | n.d.                               | n.d.                               | n.d.                                 | n.d.              | 0.48                               |
| PFTTrA      | n.d.                                | n.d.                                  | n.d.                               | n.d.                               | n.d.                                 | n.d.              | 0.64                               |
| PFDoS       | n.d.                                | n.d.                                  | n.d.                               | n.d.                               | n.d.                                 | n.d.              | 0.46                               |
| PFTA        | n.d.                                | n.d.                                  | n.d.                               | n.d.                               | n.d.                                 | n.d.              | 0.73                               |
| PFHxDA      | <0.53                               | n.d.                                  | n.d.                               | 8.4                                | n.d.                                 | 5                 | 0.53                               |
| PFODA       | n.d.                                | n.d.                                  | n.d.                               | n.d.                               | n.d.                                 | n.d.              | 0.04                               |
| 6:2 diPAP   | <293                                | <293                                  | n.d.                               | 735                                | 0.5                                  | 24                | 293                                |
| 8:2 diPAP   | <79.3                               | <79.3                                 | n.d.                               | 112                                | 1.7                                  | 10                | 79.3                               |
| 6:2 monoPAP | <69                                 | <69                                   | n.d.                               | 201                                | n.d.                                 | 10                | 69                                 |
| 8:2 monoPAP | 1.0                                 | n.d.                                  | n.d.                               | 8.0                                | n.d.                                 | 19                | 0.33                               |

170 **Table S12.** Ionic PFAS concentrations in dust from studies in indoor environments in the US, Canada, Finland, and Ireland. PFAS marked with “-“  
 171 indicate that the compound was not targeted. Values provided with “<” were detected at concentrations below quantification limits for other  
 172 studies and below the MDL for IPA Campaign homes. \*Eriksson and Kärrman (2015)<sup>21</sup> reported “n.a.” values for PFAS with detection frequencies  
 173 below 50%.

| Study                                     | Year                      | Location                                              | Size (µm) |                              | PFOA  | PFOS  | PFBS  | PFNA  | PFHxA | PFHpA | PFHxS | PFDA  | 6:2 diPAP | 8:2 diPAP |
|-------------------------------------------|---------------------------|-------------------------------------------------------|-----------|------------------------------|-------|-------|-------|-------|-------|-------|-------|-------|-----------|-----------|
| IPA Campaign                              | 2021 - 2022               | Homes (n = 11); North Carolina                        | 500       | Median (ng g <sup>-1</sup> ) | 8.3   | 80.8  | <4.8  | n.d.  | 7.2   | <1.1  | n.d.  | n.d.  | <293      | <79.3     |
| Zheng et al., 2019 <sup>22</sup>          | Not reported              | Daycares (n = 20); WA, IN                             | 500       | Median (ng g <sup>-1</sup> ) | 2.0   | 1.2   |       | 1.7   | 1.4   | 0.61  | 0.25  | 0.59  | -         | -         |
| Harrad et al., 2019 <sup>23</sup>         | 2016 - 2017               | Homes (n = 34); Ireland                               | 500       | Median (ng g <sup>-1</sup> ) | 0.42  | 0.96  | 10    | <0.05 | -     | -     | <0.1  | -     | -         | -         |
| Schildroth et al., 2022 <sup>24</sup>     | 2016                      | University spaces (n = 43); New England, USA          | 150       | Median (ng g <sup>-1</sup> ) | 100   | 41    | -     | 79    | 38    | <LOQ  | <LOQ  | 53    | -         | -         |
| Hall et al., 2020 <sup>25</sup>           | 2014 - 2016               | Homes (n = 184); North Carolina                       | 500       | Median (ng g <sup>-1</sup> ) | 7.9   | 4.4   | -     | 3     | 9     | 9     | 2     | 6     | 113       | <0.48     |
| Winkens et al., 2018 <sup>26</sup>        | 2014 - 2016               | Homes (n = 65); Kuopio, Finland                       | 500       | Median (ng g <sup>-1</sup> ) | 741   | 1890  | 20.5  | 85.1  | 336   | 374   | 1430  | 63.8  | 687       | 225       |
| Weiss et al., 2021 <sup>32</sup>          | 2013 - 2014               | Homes (n = 17); Stockholm and Uppsala regions, Sweden | 1000      | Median (ng g <sup>-1</sup> ) | 9.0   | 13    | < LOQ | 3.4   | 6.4   | 2.2   | < LOQ | 3.2   | 65        | 49        |
| Eriksson and Kärrman (2015) <sup>21</sup> | 2013 – 2014; Spain - 2009 | Homes; Australia (n = 10)                             | 150       | Median (ng g <sup>-1</sup> ) | 13.5  | 9.72  | 1.29  | 2.97  | 4.77  | 2.18  | 4.32  | 5.18  | 83.5      | 48.5      |
|                                           |                           | Homes; Canada (n = 10)                                |           |                              | 21    | 7.29  | 3.44  | 13.5  | 7.44  | 4.75  | 3.75  | 7.07  | 164       | 27.1      |
|                                           |                           | Homes; Faroe Island (n = 10)                          |           |                              | 15.3  | 5.75  | 1.88  | 2.39  | 7.96  | 2.26  | 0.37  | 4.81  | 106       | 46.9      |
|                                           |                           | Homes; Greece (n = 7)                                 |           |                              | 12.8  | 7.21  | 1.2   | 3.55  | 3.85  | n.a.* | 0.41  | 5.4   | 5.26      | 3.6       |
|                                           |                           | Homes; Japan (n = 5)                                  |           |                              | 25.5  | 3.91  | 1.33  | 35.8  | 12.0  | 6.54  | 0.76  | 10.5  | 119       | 80.8      |
|                                           |                           | Homes; Nepal (n = 10)                                 |           |                              | n.a.* | 1.16      | 0.72      |
|                                           |                           | Homes; Spain (n = 10)                                 |           |                              | 8.81  | 5.29  | 1.44  | 1.72  | 3.39  | 0.90  | 0.39  | 3.72  | 2.08      | 5.96      |
|                                           |                           | Homes; Sweden (n = 10)                                |           |                              | 14.4  | 2.77  | 1.24  | 1.96  | 7.05  | 2.61  | 0.15  | 3.72  | 15.4      | 9.53      |
| Fraser et al., 2013 <sup>27</sup>         | 2009                      | Offices (n = 31); MA                                  | 500       | GM (ng g <sup>-1</sup> )     | 32    | 14.6  | -     | 63    | 10.8  | 27.6  | -     | 46.5  | -         | -         |
|                                           |                           | Homes (n = 30); MA                                    |           |                              | 23.7  | 26.9  | -     | 10.9  | 8.65  | 12    | -     | -     | -         | -         |
|                                           |                           | Cars (n = 13); MA                                     |           |                              | 11.4  | 15.8  | -     | 14.7  | 5.92  | 8.48  | -     | 8.4   | -         | -         |
| Goosey and Harrad, 2011 <sup>28</sup>     | 2007 - 2009               | Homes (n = 10); CO                                    | 500       | Median (ng g <sup>-1</sup> ) | 240   | 310   | -     | -     | -     | -     | 240   | -     | -         | -         |
| Knobeloch et al., 2012 <sup>29</sup>      | 2008                      | Homes (n = 39); WI                                    | 1000      | Median (ng g <sup>-1</sup> ) | 44    | 47    | 1.8   | 12    | 0     | 17    | 16    | 5.7   | -         | -         |

|                                              |             |                                                               |     |                                 |     |     |      |     |      |      |      |      |     |     |
|----------------------------------------------|-------------|---------------------------------------------------------------|-----|---------------------------------|-----|-----|------|-----|------|------|------|------|-----|-----|
| De Silva et al.,<br>2012 <sup>30</sup>       | 2007 - 2008 | Homes (n = 102);<br>Vancouver, Canada                         | 150 | Median<br>(ng g <sup>-1</sup> ) | -   | -   | -    | -   | -    | -    | -    | -    | 460 | 535 |
| Strynar and<br>Lindstrom, 2008 <sup>31</sup> | 2000-2001   | Homes (n = 102) and<br>daycare centers (n = 10);<br>NC and OH | 150 | Median<br>(ng g <sup>-1</sup> ) | 142 | 201 | 9.11 | 142 | 54.2 | 50.2 | 45.5 | 6.65 | -   | -   |

174

175

## 176 Section S6: Exposure Assessment Estimates

177 **Table S13.** Summary statistics for air, water, dust, glass slab, and clothing neutral and/or ionic PFAS concentrations used in estimating exposure  
 178 for adults and children. Note that ‘-’ indicates the environmental media was not sampled for that specific PFAS and ‘n.d.’ indicates it was not  
 179 detected.

| Statistic | PFAS               | Air (ng m <sup>-3</sup> ) | Water (ng L <sup>-1</sup> ) | Dust (ng g <sup>-1</sup> ) | GS (ng cm <sup>-2</sup> ) | Clothing (ng cm <sup>-2</sup> ) |
|-----------|--------------------|---------------------------|-----------------------------|----------------------------|---------------------------|---------------------------------|
| Mean      |                    | 27.8                      | 16.0                        | 824.5                      | 4.2E-03                   | 0.25                            |
| Median    | Total PFAS         | 18.5                      | 14.3                        | 732.4                      | 2.7E-03                   | 0.13                            |
| Min       |                    | 7.52                      | 1.4                         | 303.4                      | 4.1E-04                   | 3.95E-02                        |
| Max       |                    | 108                       | 34.1                        | 1638.7                     | 1.7E-02                   | 0.92                            |
| Mean      |                    | 2.3E-02                   | 16.0                        | 549.8                      | 4.2E-03                   | -                               |
| Median    | Total Ionic PFAS   | 1.6E-02                   | 14.3                        | 496.5                      | 2.7E-03                   | -                               |
| Min       |                    | 1.3E-03                   | 1.4                         | 201.7                      | 4.1E-04                   | -                               |
| Max       |                    | 1.4E-01                   | 34.1                        | 1036.2                     | 1.7E-02                   | -                               |
| Mean      |                    | 27.8                      | -                           | 274.8                      | -                         | 0.25                            |
| Median    | Total Neutral PFAS | 18.5                      | -                           | 235.9                      | -                         | 0.13                            |
| Min       |                    | 7.52                      | -                           | 101.6                      | -                         | 3.95E-02                        |
| Max       |                    | 108                       | -                           | 602.4                      | -                         | 0.92                            |
| Mean      |                    | 3.6E-03                   | -                           | 361.2                      | 1.8E-03                   | -                               |
| Median    | Total PAPs         | 1.7E-03                   | -                           | 311.9                      | 4.8E-04                   | -                               |
| Min       |                    | n.d.                      | -                           | 104.9                      | n.d.                      | -                               |
| Max       |                    | 2.4E-02                   | -                           | 991.2                      | 1.1E-02                   | -                               |
| Mean      |                    | 1.6E-02                   | 9.7                         | 48.1                       | 2.3E-03                   | -                               |
| Median    | Total PFCAs        | 9.2E-03                   | 8.6                         | 30.1                       | 1.8E-03                   | -                               |
| Min       |                    | n.d.                      | 0.7                         | 2.5                        | 1.2E-04                   | -                               |
| Max       |                    | 0.12                      | 22.0                        | 346.5                      | 7.9E-03                   | -                               |
| Mean      |                    | 1.8E-03                   | 6.3                         | 140.5                      | 1.9E-04                   | -                               |
| Median    | Total PFSAs        | 8.7E-04                   | 5.7                         | 105.6                      | 1.9E-04                   | -                               |
| Min       |                    | n.d.                      | 0.7                         | 29.7                       | 5.4E-05                   | -                               |
| Max       |                    | 6.3E-03                   | 12.1                        | 405.8                      | 3.9E-04                   | -                               |
| Mean      |                    | 26.7                      | -                           | 207.4                      | -                         | 0.19                            |
| Median    | Total FTOHs        | 17.2                      | -                           | 173.0                      | -                         | 0.11                            |
| Min       |                    | 5.76                      | -                           | 74.7                       | -                         | 2.3E-03                         |
| Max       |                    | 107                       | -                           | 529.8                      | -                         | 0.84                            |
| Mean      |                    | 0.78                      | -                           | 64.2                       | -                         | 6.6E-02                         |
| Median    | Total FOSAs/FOSEs  | 0.71                      | -                           | 46.3                       | -                         | 4.5E-02                         |
| Min       |                    | 0.2                       | -                           | n.d.                       | -                         | 2.5E-03                         |
| Max       |                    | 1.26                      | -                           | 208.2                      | -                         | 0.22                            |

180 **Table S14.** Daily intake rates (ng kg<sup>-1</sup> d<sup>-1</sup>) for each exposure route and total exposure for inhalation, ingestion, and dermal exposure routes as well  
 181 as percent contribution of each route for a simulated adult. Note that ‘-’ indicates the environmental media was not sampled for that specific PFAS  
 182 and ‘n.d.’ indicates it was not detected.  
 183

|        |         | Exposure (ng kg <sup>-1</sup> d <sup>-1</sup> ) |                      |                     |                  |                     |                |           | Percent Contribution (%) |                    |                   |                         |
|--------|---------|-------------------------------------------------|----------------------|---------------------|------------------|---------------------|----------------|-----------|--------------------------|--------------------|-------------------|-------------------------|
|        |         | Inhalation                                      | Ingestion -<br>Water | Ingestion -<br>Dust | Dermal -<br>Dust | Dermal -<br>Surface | Air to<br>Skin | ΣExposure | Inhalation               | Ingestion<br>Water | Ingestion<br>Dust | Dermal<br>Dust/Surfaces |
| Mean   |         | 3.1                                             | 0.26                 | 0.21                | 8.9E-05          | 5.7E-7              | 5.3E-3         | 3.56      | 86.7                     | 7.3                | 5.9               | 1.5E-01                 |
| Median | Total   | 2.1                                             | 0.23                 | 0.19                | 7.9E-05          | 3.6E-7              | 4.8E-3         | 2.47      | 82.9                     | 9.4                | 7.5               | 2.0E-01                 |
| Min    | PFAS    | 0.83                                            | 0.02                 | 7.7E-02             | 3.3E-05          | 5.5E-8              | 1.3E-3         | 0.94      | 89.1                     | 2.5                | 8.2               | 1.5E-01                 |
| Max    |         | 12.0                                            | 0.55                 | 0.42                | 1.8E-04          | 2.2E-6              | 8.5E-3         | 12.9      | 92.4                     | 4.3                | 3.2               | < 0.05                  |
| Mean   |         | 2.5E-3                                          | 0.26                 | 0.14                | 5.9E-05          | 5.7E-7              | -              | 0.4       | 0.6                      | 64.6               | 34.8              | < 0.05                  |
| Median | Total   | 1.8E-3                                          | 0.23                 | 0.13                | 5.3E-05          | 3.6E-7              | -              | 0.36      | 0.5                      | 64.4               | 35.1              | < 0.05                  |
| Min    | Ionic   | 1.4E-4                                          | 0.02                 | 5.1E-02             | 2.2E-05          | 5.5E-8              | -              | 7.4E-02   | 0.2                      | 31.0               | 68.8              | < 0.05                  |
| Max    | PFAS    | 1.5E-2                                          | 0.55                 | 0.26                | 1.1E-04          | 2.2E-6              | -              | 0.83      | 1.8                      | 66.5               | 31.6              | < 0.05                  |
| Mean   |         | 3.1                                             | -                    | 7.0E-02             | 3.0E-05          | -                   | 5.3E-3         | 3.2       | 97.6                     | -                  | 2.2               | 1.7E-01                 |
| Median | Total   | 2.0                                             | -                    | 6.0E-02             | 2.5E-05          | -                   | 4.8E-3         | 2.1       | 96.9                     | -                  | 2.8               | 2.3E-01                 |
| Min    | Neutral | 0.83                                            | -                    | 2.6E-02             | 1.1E-05          | -                   | 1.3E-3         | 0.86      | 96.8                     | -                  | 3.0               | 1.6E-01                 |
| Max    | PFAS    | 12.0                                            | -                    | 0.15                | 6.5E-05          | -                   | 8.5E-3         | 12.1      | 98.7                     | -                  | 1.3               | < 0.05                  |
| Mean   |         | 4.E-4                                           | -                    | 9.2E-02             | 3.9E-05          | 2.4E-7              | -              | 9.23E-02  | 0.4                      | -                  | 99.5              | < 0.05                  |
| Median | Total   | 1.8E-4                                          | -                    | 7.9E-02             | 3.3E-05          | 6.5E-8              | -              | 7.95E-02  | 0.2                      | -                  | 99.7              | < 0.05                  |
| Min    | PAPs    | n.d.                                            | -                    | 2.7E-02             | 1.1E-05          | n.d.                | -              | 2.67E-02  | n.d.                     | -                  | 100               | < 0.05                  |
| Max    |         | 2.7E-3                                          | -                    | 0.25                | 1.1E-04          | 1.4E-6              | -              | 0.26      | 1.1                      | -                  | 98.9              | < 0.05                  |
| Mean   |         | 1.8E-3                                          | 0.16                 | 1.2E-02             | 5.2E-06          | 3.0E-7              | -              | 0.17      | 1.0                      | 91.9               | 7.1               | < 0.05                  |
| Median | Total   | 1.E-3                                           | 0.14                 | 7.6E-03             | 3.2E-06          | 2.4E-7              | -              | 0.15      | 0.7                      | 94.2               | 5.2               | < 0.05                  |
| Min    | PFCA    | n.d.                                            | 0.01                 | 6.5E-04             | 2.7E-07          | 1.6E-8              | -              | 1.26E-02  | n.d.                     | 94.9               | 5.1               | < 0.05                  |
| Max    |         | 1.3E-2                                          | 0.36                 | 8.8E-02             | 3.7E-05          | 1.1E-6              | -              | 0.46      | 2.9                      | 77.9               | 19.2              | < 0.05                  |
| Mean   |         | 1.9E-4                                          | 0.10                 | 3.6E-02             | 1.5E-05          | 2.5E-8              | -              | 0.14      | 0.1                      | 73.9               | 25.9              | < 0.05                  |
| Median | Total   | 9.7E-5                                          | 0.09                 | 2.7E-02             | 1.1E-05          | 2.6E-8              | -              | 0.12      | 0.1                      | 77.3               | 22.6              | < 0.05                  |
| Min    | PFSA    | n.d.                                            | 0.01                 | 7.5E-03             | 3.2E-06          | 7.3E-9              | -              | 1.87E-02  | n.d.                     | 59.6               | 40.3              | < 0.05                  |
| Max    |         | 7.0E-4                                          | 0.20                 | 0.1                 | 4.4E-05          | 5.3E-8              | -              | 0.3       | 0.2                      | 65.4               | 34.4              | < 0.05                  |
| Mean   |         | 3.0                                             | -                    | 5.3E-02             | 2.2E-05          | -                   | -              | 3.01      | 98.2                     | -                  | 1.8               | < 0.05                  |
| Median | Total   | 1.9                                             | -                    | 4.4E-02             | 1.9E-05          | -                   | -              | 1.95      | 97.7                     | -                  | 2.3               | < 0.05                  |
| Min    | FTOHs   | 0.64                                            | -                    | 1.9E-02             | 8.0E-06          | -                   | -              | 0.66      | 97.1                     | -                  | 2.9               | < 0.05                  |
| Max    |         | 12.0                                            | -                    | 0.13                | 5.7E-05          | -                   | -              | 12.0      | 98.9                     | -                  | 1.1               | < 0.05                  |
| Mean   |         | 8.7E-2                                          | -                    | 1.6E-02             | 6.9E-06          | -                   | 5.3E-3         | 0.11      | 80.0                     | -                  | 15.0              | 4.9                     |
| Median | Total   | 7.9E-2                                          | -                    | 1.2E-02             | 5.0E-06          | -                   | 4.8E-3         | 9.53E-02  | 82.6                     | -                  | 12.4              | 5.1                     |
| Min    | FOSAs/F | 2.2E-2                                          | -                    | n.d.                | n.d.             | -                   | 1.3E-3         | 2.33E-02  | 94.2                     | -                  | n.d.              | 5.8                     |
| Max    | OSEs    | 0.14                                            | -                    | 5.3E-02             | 2.2E-05          | -                   | 8.5E-3         | 0.2       | 69.4                     | -                  | 26.4              | 4.3                     |

185 **Table S15.** Daily intake rates (ng kg<sup>-1</sup> d<sup>-1</sup>) for each exposure route and total exposure for inhalation, ingestion, and dermal exposure routes as well  
 186 as percent contribution of each route for a simulated 2-year old child. Note that ‘-’ indicates the environmental media was not sampled for that  
 187 specific PFAS and ‘n.d.’ indicates it was not detected.  
 188

|        |                       | Exposure (ng kg <sup>-1</sup> d <sup>-1</sup> ) |                 |                |             |                 |                    |          |             | Percent Contribution (%) |            |                 |                         |          |        |
|--------|-----------------------|-------------------------------------------------|-----------------|----------------|-------------|-----------------|--------------------|----------|-------------|--------------------------|------------|-----------------|-------------------------|----------|--------|
|        |                       | Inhalation                                      | Ingestion Water | Ingestion Dust | Dermal Dust | Dermal Surfaces | Ingestion Surfaces | Mouthing | Air to Skin | ΣExposure                | Inhalation | Ingestion Water | Ingestion Dust/Surfaces | Mouthing | Dermal |
| Mean   | Total PFAS            | 8.4                                             | 0.27            | 2.81           | 9.5E-04     | 5.0E-6          | 0.32               | 0.59     | 8.5E-4      | 12.4                     | 67.9       | 2.2             | 25.2                    | 4.8      | < 0.05 |
| Median |                       | 5.6                                             | 0.24            | 2.5            | 8.4E-04     | 3.2E-6          | 0.2                | 0.32     | 5.8E-4      | 8.9                      | 63.3       | 2.7             | 30.5                    | 3.6      | < 0.05 |
| Min    |                       | 2.3                                             | 0.02            | 1.03           | 3.5E-04     | 4.9E-7          | 3.1E-2             | 0.09     | 3.2E-5      | 3.5                      | 65.9       | 0.7             | 30.8                    | 2.7      | < 0.05 |
| Max    |                       | 32.6                                            | 0.57            | 5.59           | 1.9E-03     | 2.0E-5          | 1.24               | 2.16     | 2.9E-3      | 42.2                     | 77.3       | 1.4             | 16.2                    | 5.1      | < 0.05 |
| Mean   | Total Ionic PFAS      | 6.9E-3                                          | 0.27            | 1.87           | 6.3E-04     | 5.0E-6          | 0.32               | -        | -           | 2.5                      | 0.3        | 10.8            | 88.9                    | -        | < 0.05 |
| Median |                       | 4.8E-3                                          | 0.24            | 1.69           | 5.7E-04     | 3.2E-6          | 0.2                | -        | -           | 2.1                      | 0.2        | 11.1            | 88.6                    | -        | < 0.05 |
| Min    |                       | 3.8E-4                                          | 0.02            | 0.69           | 2.3E-04     | 4.9E-7          | 3.6E-2             | -        | -           | 0.7                      | < 0.05     | 3.2             | 96.8                    | -        | < 0.05 |
| Max    |                       | 4.1E-2                                          | 0.57            | 3.53           | 1.2E-03     | 2.0E-5          | 1.24               | -        | -           | 5.4                      | 0.8        | 10.6            | 88.6                    | -        | < 0.05 |
| Mean   | Total Neutral PFAS    | 8.43                                            | -               | 0.94           | 3.2E-04     | -               | -                  | 0.59     | 8.5E-4      | 10.0                     | 84.6       | -               | 9.4                     | 6.0      | < 0.05 |
| Median |                       | 5.6                                             | -               | 0.8            | 2.7E-04     | -               | -                  | 0.32     | 5.8E-4      | 6.7                      | 83.3       | -               | 12.0                    | 4.7      | < 0.05 |
| Min    |                       | 2.28                                            | -               | 0.35           | 1.2E-04     | -               | -                  | 0.09     | 3.2E-5      | 2.7                      | 83.8       | -               | 12.7                    | 3.4      | < 0.05 |
| Max    |                       | 32.6                                            | -               | 2.05           | 6.9E-04     | -               | -                  | 2.16     | 2.9E-3      | 36.8                     | 88.6       | -               | 5.6                     | 5.9      | < 0.05 |
| Mean   | Total PAPs            | 1.1E-3                                          | -               | 1.23           | 4.2E-04     | 2.1E-6          | 0.13               | -        | -           | 1.4                      | 0.1        | -               | 99.9                    | -        | < 0.05 |
| Median |                       | 5.3E-4                                          | -               | 1.06           | 3.6E-04     | 5.8E-7          | 3.6E-2             | -        | -           | 1.1                      | 4.6E-02    | -               | 99.9                    | -        | < 0.05 |
| Min    |                       | n.d.                                            | -               | 0.36           | 1.2E-04     | n.d.            | n.d.               | -        | -           | 0.4                      | n.d.       | -               | 100.0                   | -        | < 0.05 |
| Max    |                       | 7.4E-3                                          | -               | 3.38           | 1.1E-03     | 1.3E05          | 0.79               | -        | -           | 4.2                      | 0.2        | -               | 99.8                    | -        | < 0.05 |
| Mean   | Total PFCAs           | 4.8E-3                                          | 0.16            | 0.16           | 5.6E-05     | 2.7E-6          | 0.17               | -        | -           | 0.5                      | 1.0        | 32.5            | 66.5                    | -        | < 0.05 |
| Median |                       | 2.8E-3                                          | 0.14            | 0.1            | 3.5E-05     | 2.1E-6          | 0.13               | -        | -           | 0.4                      | 0.7        | 37.7            | 61.6                    | -        | < 0.05 |
| Min    |                       | n.d.                                            | 0.01            | 8.68E-03       | 2.9E-06     | 1.4E-7          | 9.0E-3             | -        | -           | 3.0E-2                   | n.d.       | 41.1            | 58.9                    | -        | < 0.05 |
| Max    |                       | 3.6E-2                                          | 0.37            | 1.18           | 4.0E-04     | 9.4E-6          | 0.59               | -        | -           | 2.2                      | 1.7        | 16.9            | 81.4                    | -        | < 0.05 |
| Mean   | Total PFSAs           | 5.3E-4                                          | 0.10            | 0.48           | 1.6E-04     | 2.3E-7          | 1.4E-2             | -        | -           | 0.6                      | 0.1        | 17.5            | 82.4                    | -        | < 0.05 |
| Median |                       | 2.7E-4                                          | 0.09            | 0.36           | 1.2E-04     | 2.3E-7          | 1.4E-2             | -        | -           | 0.5                      | 0.1        | 20.2            | 79.7                    | -        | < 0.05 |
| Min    |                       | n.d.                                            | 0.01            | 0.10           | 3.4E-05     | 6.5E-8          | 4.1E-3             | -        | -           | 0.1                      | n.d.       | 9.8             | 90.1                    | -        | < 0.05 |
| Max    |                       | 1.9E-3                                          | 0.20            | 1.38           | 4.7E-04     | 4.7E-7          | 2.9E-2             | -        | -           | 1.6                      | 0.1        | 12.5            | 87.4                    | -        | < 0.05 |
| Mean   | Total FTOHs           | 8.09                                            | -               | 0.71           | 2.4E-04     | -               | -                  | 0.44     | -           | 9.2                      | 87.6       | -               | 7.7                     | 4.8      | < 0.05 |
| Median |                       | 5.22                                            | -               | 0.59           | 2.0E-04     | -               | -                  | 0.26     | -           | 6.1                      | 86.0       | -               | 9.7                     | 4.3      | < 0.05 |
| Min    |                       | 1.75                                            | -               | 0.25           | 8.6E-05     | -               | -                  | 0.01     | -           | 2.0                      | 87.0       | -               | 12.7                    | 0.3      | < 0.05 |
| Max    |                       | 32.5                                            | -               | 1.81           | 6.1E-04     | -               | -                  | 1.97     | -           | 36.2                     | 89.6       | -               | 5.0                     | 5.4      | < 0.05 |
| Mean   | Total FOSAs/<br>FOSEs | 0.24                                            | -               | 0.22           | 7.4E-05     | -               | -                  | 0.16     | 8.5E-4      | 0.6                      | 38.7       | -               | 35.7                    | 25.4     | 0.15   |
| Median |                       | 0.22                                            | -               | 0.16           | 5.3E-05     | -               | -                  | 0.11     | 5.8E-4      | 0.5                      | 44.9       | -               | 33.0                    | 22.0     | 0.13   |
| Min    |                       | 6.0E-2                                          | -               | n.d.           | n.d.        | -               | -                  | 0.01     | 3.2E-5      | 0.1                      | 91.1       | -               | n.d.                    | 8.9      | < 0.05 |
| Max    |                       | 0.38                                            | -               | 0.71           | 2.4E-04     | -               | -                  | 0.53     | 2.9E-3      | 1.6                      | 23.5       | -               | 43.8                    | 32.5     | 0.19   |

189

190 **Table S16.** Percent contribution to  $\Sigma$ PFAS,  $\Sigma$ (Ionic PFAS), and  $\Sigma$ (Neutral PFAS) exposure via inhalation, ingestion of water, ingestion of dust/surfaces  
 191 (and mouthing of clothing for a simulated 2-year old), and dermal uptake with and without estimated dietary exposure. The intake rate of dietary  
 192 exposure was  $250 \text{ ng d}^{-1}$ , which was determined by Tittlemier et al. (2007)<sup>12</sup> for Canadians over 12 years of age for seven PFCAs and PFOS. As such,  
 193 percent contribution including diet should be interpreted with caution.  
 194

|               | Adult                                                           |            |                      |                              |         |      | 2 - Yr Old                                                      |            |                      |                                    |         |      |
|---------------|-----------------------------------------------------------------|------------|----------------------|------------------------------|---------|------|-----------------------------------------------------------------|------------|----------------------|------------------------------------|---------|------|
|               | Total Exposure<br>$\text{ng kg}^{-1} \text{d}^{-1}$             | Inhalation | Ingestion -<br>Water | Ingestion -<br>Dust/Surfaces | Dermal  | Diet | Total Exposure<br>$\text{ng kg}^{-1} \text{d}^{-1}$             | Inhalation | Ingestion -<br>Water | Ingestion -<br>Dust/Surfaces/Cloth | Dermal  | Diet |
| Total PFAS    | 7.1                                                             | 43.7       | 3.7                  | 3.0                          | 8.E-02  | 49.6 | 31.3                                                            | 26.9       | 0.9                  | 11.9                               | 5.8E-03 | 60.3 |
| Total Ionic   | 3.9                                                             | 0.1        | 6.7                  | 3.6                          | 2.E-03  | 89.7 | 21.4                                                            | 3.2E-02    | 1.3                  | 10.3                               | 3.0E-03 | 88.5 |
| Total Neutral | 3.2                                                             | 97.6       |                      | 2.2                          | 2.E-01  |      | 10.0                                                            | 84.6       | -                    | 15.4                               | 1.2E-02 | -    |
|               | Total Exposure<br>w/o Diet<br>$\text{ng kg}^{-1} \text{d}^{-1}$ | Inhalation | Ingestion -<br>Water | Ingestion -<br>Dust/Surfaces | Dermal  |      | Total Exposure<br>w/o Diet<br>$\text{ng kg}^{-1} \text{d}^{-1}$ | Inhalation | Ingestion -<br>Water | Ingestion -<br>Dust/Surfaces/Cloth | Dermal  |      |
| Total PFAS    | 3.6                                                             | 86.7       | 7.3                  | 5.9                          | 0.2     |      | 12.4                                                            | 67.9       | 2.2                  | 30.0                               | 1.5E-02 |      |
| Total Ionic   | 0.4                                                             | 0.6        | 64.6                 | 34.8                         | 1.5E-02 |      | 2.5                                                             | 0.3        | 10.8                 | 88.9                               | 2.6E-02 |      |
| Total Neutral | 3.2                                                             | 97.6       | -                    | 2.2                          | 0.2     |      | 10.0                                                            | 84.6       | -                    | 15.4                               | 1.2E-02 |      |

195



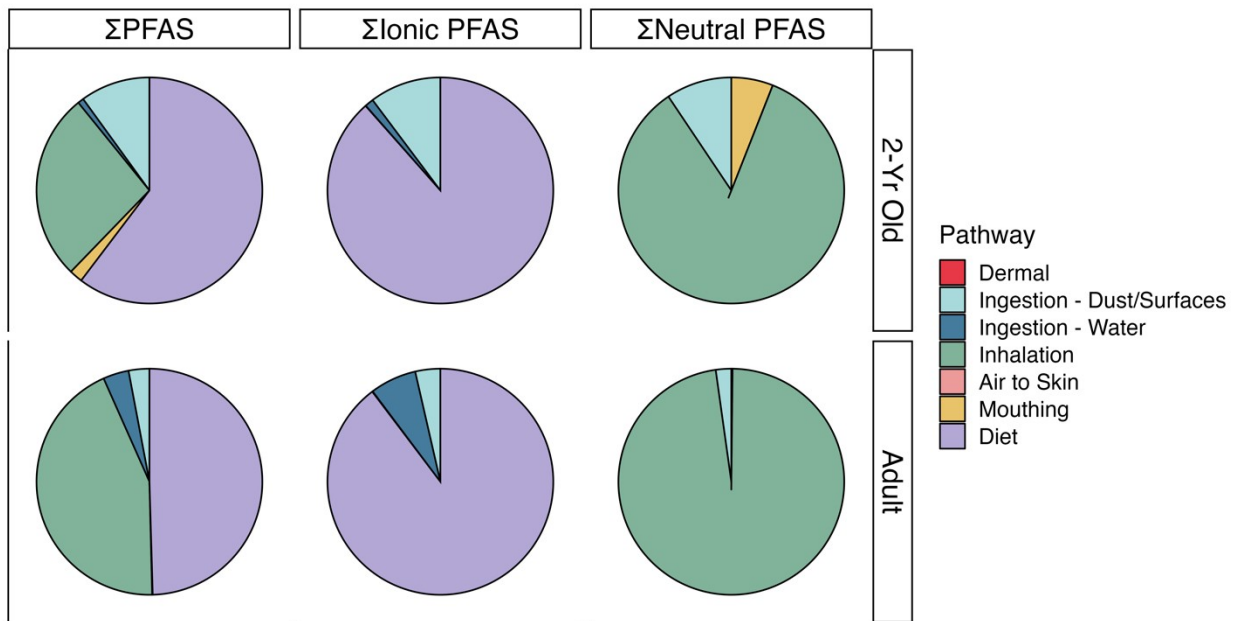

196 **Figure S3.** Relative contributions to daily exposure to  $\Sigma$ PFAS,  $\Sigma$ (Ionic PFAS), and  $\Sigma$ (Neutral PFAS) for a  
 197 simulated adult and 2-year-old child from diet, inhalation, ingestion of dust, hand-to-mouth behavior  
 198 after surface contact, ingestion of tap water, dermal uptake from direct contact with dust and surfaces,  
 199 as well as air-to-skin uptake for the FOSE/FOSAs only.

200  
201  
202  
203

**Table S17.** Estimate of 8:2FTOH biotransformed PFOA contributions to PFOA and  $\Sigma$ (Ionic PFAS) using a biotransformation rate of 0.5%.<sup>19</sup>

| Adult      |                                                    |                                                               |                                                |                                                                 |                                  |                                                   |
|------------|----------------------------------------------------|---------------------------------------------------------------|------------------------------------------------|-----------------------------------------------------------------|----------------------------------|---------------------------------------------------|
|            | 8:2 FTOH<br>(ng kg <sup>-1</sup> d <sup>-1</sup> ) | 8:2 FTOH<br>-> PFOA<br>(ng kg <sup>-1</sup> d <sup>-1</sup> ) | PFOA<br>(ng kg <sup>-1</sup> d <sup>-1</sup> ) | $\Sigma$ (Ionic PFAS)<br>(ng kg <sup>-1</sup> d <sup>-1</sup> ) | (8:2 FTOH -> PFOA) / PFOA<br>(%) | (8:2 FTOH -> PFOA) / $\Sigma$ (Ionic PFAS)<br>(%) |
| Inhalation | 1.7                                                | 8.4E-3                                                        | 1.2E-5                                         | 2.5E-3                                                          | 68727                            | 331                                               |
| Dermal     | 5.2E-6                                             | 2.6E-08                                                       | 9.6E-7                                         | 6.0E-5                                                          | 2.7                              | 4.3E-2                                            |
| Ingestion  | 1.2E-2                                             | 6.1E-5                                                        | 6.1E-2                                         | 4.0E-1                                                          | 1.0E-1                           | 1.5E-2                                            |
| 2 - Yr Old |                                                    |                                                               |                                                |                                                                 |                                  |                                                   |
|            | 8:2 FTOH<br>(ng kg <sup>-1</sup> d <sup>-1</sup> ) | 8:2 FTOH<br>-> PFOA<br>(ng kg <sup>-1</sup> d <sup>-1</sup> ) | PFOA<br>(ng kg <sup>-1</sup> d <sup>-1</sup> ) | $\Sigma$ (Ionic PFAS)<br>(ng kg <sup>-1</sup> d <sup>-1</sup> ) | (8:2 FTOH -> PFOA) / PFOA<br>(%) | (8:2 FTOH -> PFOA) / $\Sigma$ (Ionic PFAS)<br>(%) |
| Inhalation | 4.6                                                | 2.3E-2                                                        | 3.3E-5                                         | 6.9E-3                                                          | 68727                            | 331                                               |
| Dermal     | 5.5E-5                                             | 2.8E-7                                                        | 2.2E-5                                         | 6.4E-4                                                          | 1.3                              | 4.3E-2                                            |
| Ingestion  | 3.2E-1                                             | 1.6E-3                                                        | 1.5E-1                                         | 2.5                                                             | 1.1                              | 6.5E-2                                            |

204  
205

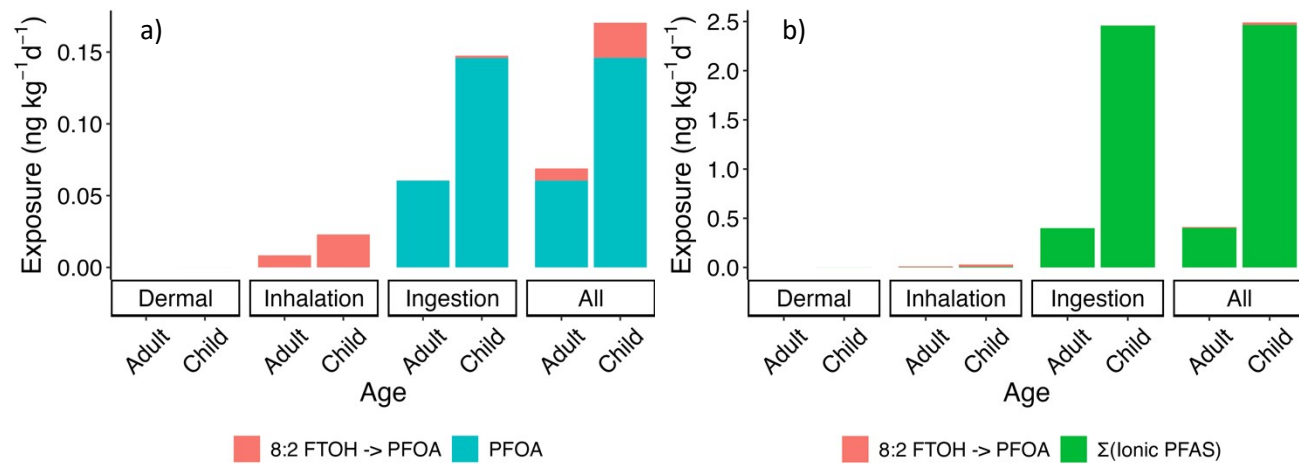

206  
 207 **Figure S4.** Contribution of biotransformed 8:2 FTOH to PFOA to estimated PFOA body burden (a) and Σ(Ionic PFAS) body burden (b) for a  
 208 simulated adult and child.  
 209

## References:

- (1) Chang, N. Y.; Eichler, C. M. A.; Amparo, D. E.; Zhou, J.; Baumann, K.; Cohen Hubal, E. A.; Surratt, J. D.; Morrison, G. C.; Turpin, B. J. Indoor Air Concentrations of PM<sub>2.5</sub> Quartz Fiber Filter-Collected Ionic PFAS and Emissions to Outdoor Air: Findings from the IPA Campaign. *Environ. Sci.: Processes Impacts* **2024**.
- (2) Zhou, J.; Baumann, K.; Mead, R. N.; Skrabal, S. A.; Kieber, R. J.; Avery, G. B.; Shimizu, M.; DeWitt, J. C.; Sun, M.; Vance, S. A.; Bodnar, W.; Zhang, Z.; Collins, L. B.; Surratt, J. D.; Turpin, B. J. PFOS Dominates PFAS Composition in Ambient Fine Particulate Matter (PM<sub>2.5</sub>) Collected across North Carolina Nearly 20 Years after the End of Its US Production. *Environ. Sci. Process. Impacts* **2021**, *23*, 580–587.
- (3) Eichler, C. M. A.; Chang, N. Y.; Cohen Hubal, E. A.; Amparo, D. E.; Zhou, J.; Surratt, J. D.; Morrison, G. C.; Turpin, B. J. Cloth-Air Partitioning of Neutral Per- and Polyfluoroalkyl Substances (PFAS) in North Carolina Homes during the Indoor PFAS Assessment (IPA) Campaign. *Environ. Sci. Technol.* **2023**, *57*, 15173–15183.
- (4) Strynar, M.; Medina-Vera, M. *Improved Method for Extraction and Analysis of Perfluorinated Compounds (PFCs) from Surface Waters and Well Water by Ultra-High Performance Liquid Chromatography (UPLC)-Tandem Mass Spectrometry (MS/MS)*; D-EMMD-PHCB-043-SOP-03; US EPA, 2016.
- (5) Gewurtz, S. B.; Bhavsar, S. P.; Crozier, P. W.; Diamond, M. L.; Helm, P. A.; Marvin, C. H.; Reiner, E. J. Perfluoroalkyl Contaminants in Window Film: Indoor/Outdoor, Urban/Rural, and Winter/Summer Contamination and Assessment of Carpet as a Possible Source. *Environ. Sci. Technol.* **2009**, *43*, 7317–7323.
- (6) Eichler, C. M. A.; Chang, N. Y.; Amparo, D. E.; Cohen Hubal, E. A.; Surratt, J. D.; Morrison, G. C.; Turpin, B. J. Partitioning of Neutral PFAS in Homes and Release to the Outdoor Environment: Results from the IPA Campaign. *Environ. Sci. Technol.* **2024**.
- (7) U.S. EPA. *Exposure Factors Handbook 2011 Edition (Final Report)*; U.S. Environmental Protection Agency, Washington, DC, EPA/600/R-09/052F, 2011.
- (8) East, A.; Egeghy, P. P.; Hubal, E. A. C.; Slover, R.; Vallero, D. A. Computational Estimates of Daily Aggregate Exposure to PFOA/PFOS from 2011 to 2017 Using a Basic Intake Model. *J. Expo. Sci. Environ. Epidemiol.* **2021**.
- (9) Weschler, C. J.; Nazaroff, W. W. SVOC Exposure Indoors: Fresh Look at Dermal Pathways. *Indoor Air* **2012**, *22*, 356–377.
- (10) Kissel, J. C.; Titley, I. A.; Muensterman, D. J.; Field, J. A. Evaluating Neutral PFAS for Potential Dermal Absorption from the Gas Phase. *Environ. Sci. Technol.* **2023**, *57*, 4951–4958.
- (11) Franko, J.; Meade, B. J.; Frasc, H. F.; Barbero, A. M.; Anderson, S. E. Dermal Penetration Potential of Perfluorooctanoic Acid (PFOA) in Human and Mouse Skin. *J. Toxicol. Environ. Health Part A* **2012**, *75*, 50–62.

- (12) Tittlemier, S. A.; Pepper, K.; Seymour, C.; Moisey, J.; Bronson, R.; Cao, X.-L.; Dabeka, R. W. Dietary Exposure of Canadians to Perfluorinated Carboxylates and Perfluorooctane Sulfonate via Consumption of Meat, Fish, Fast Foods, and Food Items Prepared in Their Packaging. *J. Agric. Food Chem.* **2007**, *55*, 3203–3210.
- (13) Cohen Hubal, E. A.; Egeghy, P. P.; Leovic, K. W.; Akland, G. G. Measuring Potential Dermal Transfer of a Pesticide to Children in a Child Care Center. *Environ. Health Perspect.* **2006**, *114*, 264–269.
- (14) Fasano, W. J.; Kennedy, G. L.; Szostek, B.; Farrar, D. G.; Ward, R. J.; Haroun, L.; Hinderliter, P. M. Penetration of Ammonium Perfluorooctanoate through Rat and Human Skin in Vitro. *Drug Chem. Toxicol.* **2005**, *28*, 79–90.
- (15) US EPA. *Standard Operating Procedures for Residential Pesticide Exposure Assessment*; US EPA, 2012.
- (16) Nicas, M.; Best, D. A Study Quantifying the Hand-to-Face Contact Rate and Its Potential Application to Predicting Respiratory Tract Infection. *J. Occup. Environ. Hyg.* **2008**, *5*, 347–352.
- (17) Morrison, G.; Shakila, N. V.; Parker, K. Accumulation of Gas-Phase Methamphetamine on Clothing, Toy Fabrics, and Skin Oil. *Indoor Air* **2015**, *25*, 405–414.
- (18) Gennings, C.; Hauser, R.; Koch, H. M.; Kortenkamp, A.; Lioy, P. J.; Mirkes, P. E.; Schwetz, B. A. *CHRONIC HAZARD ADVISORY PANEL ON PHTHALATES AND PHTHALATE ALTERNATIVES*; U.S. Consumer Product Safety Commission: Bethesda, MD, 2014.
- (19) Himmelstein, M. W.; Serex, T. L.; Buck, R. C.; Weinberg, J. T.; Mawn, M. P.; Russell, M. H. 8:2 Fluorotelomer Alcohol: A One-Day Nose-Only Inhalation Toxicokinetic Study in the Sprague-Dawley Rat with Application to Risk Assessment. *Toxicology* **2012**, *291*, 122–132.
- (20) Sinakumar, I. T.; Young, D.; Langston, M. *Data Processing and Validation*; UCD IMPROVE Standard Operating Procedure; Version 6.0.; 351; UC Davis, 2022; pp. 1–12.
- (21) Eriksson, U.; Kärrman, A. World-Wide Indoor Exposure to Polyfluoroalkyl Phosphate Esters (PAPs) and Other PFASs in Household Dust. *Environ. Sci. Technol.* **2015**, *49*, 14503–14511.
- (22) Zheng, G.; Boor, B. E.; Schreder, E.; Salamova, A. Indoor Exposure to Per- and Polyfluoroalkyl Substances (PFAS) in the Childcare Environment. *Environ. Pollut.* **2020**, *258*, 113714.
- (23) Harrad, S.; Wemken, N.; Drage, D. S.; Abdallah, M. A.-E.; Coggins, A.-M. Perfluoroalkyl Substances in Drinking Water, Indoor Air and Dust from Ireland: Implications for Human Exposure. *Environ. Sci. Technol.* **2019**, *53*, 13449–13457.
- (24) Schildroth, S.; Rodgers, K. M.; Strynar, M.; McCord, J.; Poma, G.; Covaci, A.; Dodson, R. E. Per- and Polyfluoroalkyl Substances (PFAS) and Persistent Chemical Mixtures in Dust from U.S. Colleges. *Environ. Res.* **2022**, *206*, 112530.
- (25) Hall, S. M.; Patton, S.; Petreas, M.; Zhang, S.; Phillips, A. L.; Hoffman, K.; Stapleton, H. M. Per- and Polyfluoroalkyl Substances in Dust Collected from Residential Homes and Fire Stations in North America. *Environ. Sci. Technol.* **2020**, *54*, 14558–14567.

- (26) Winkens, K.; Giovanoulis, G.; Koponen, J.; Vestergren, R.; Berger, U.; Karvonen, A. M.; Pekkanen, J.; Kiviranta, H.; Cousins, I. T. Perfluoroalkyl Acids and Their Precursors in Floor Dust of Children's Bedrooms - Implications for Indoor Exposure. *Environ. Int.* **2018**, *119*, 493–502.
- (27) Fraser, A. J.; Webster, T. F.; Watkins, D. J.; Strynar, M. J.; Kato, K.; Calafat, A. M.; Vieira, V. M.; McClean, M. D. Polyfluorinated Compounds in Dust from Homes, Offices, and Vehicles as Predictors of Concentrations in Office Workers' Serum. *Environ. Int.* **2013**, *60*, 128–136.
- (28) Goosey, E.; Harrad, S. Perfluoroalkyl Compounds in Dust from Asian, Australian, European, and North American Homes and UK Cars, Classrooms, and Offices. *Environ. Int.* **2011**, *37*, 86–92.
- (29) Knobeloch, L.; Imm, P.; Anderson, H. Perfluoroalkyl Chemicals in Vacuum Cleaner Dust from 39 Wisconsin Homes. *Chemosphere* **2012**, *88*, 779–783.
- (30) De Silva, A. O.; Allard, C. N.; Spencer, C.; Webster, G. M.; Shoeib, M. Phosphorus-Containing Fluorinated Organics: Polyfluoroalkyl Phosphoric Acid Diesters (DiPAPs), Perfluorophosphonates (PFPAAs), and Perfluorophosphinates (PFPIAs) in Residential Indoor Dust. *Environ. Sci. Technol.* **2012**, *46*, 12575–12582.
- (31) Strynar, M. J.; Lindstrom, A. B. Perfluorinated Compounds in House Dust from Ohio and North Carolina, USA. *Environ. Sci. Technol.* **2008**, *42*, 3751–3756.
- (32) Weiss, J. M.; Jones, B.; Koekkoek, J.; Bignert, A.; Lamoree, M. H. Per- and Polyfluoroalkyl Substances (PFASs) in Swedish Household Dust and Exposure of Pet Cats. *Environ. Sci. Pollut. Res. Int.* **2021**, *28*, 39001–39013.
